# Supplementary material for: Modeling the marine chromium cycle: New constraints on global-scale processes
Source: Copernicus journal article supplement (doi:10.5194/bg-2021-106), 2021-05-18
Supplement: Supplementary file 1 [file bg-2021-106-supplement.zip]

Archive with 2 entries (2 files):
- Poeppelmeier2021BG_Supplement.pdf
- SupplementaryData.xlsx
