# Supplementary material for: Modeling the marine chromium cycle: New constraints on global-scale processes
Source: Copernicus journal article supplement (doi:10.5194/bg-2021-106), 2021-05-18
Supplement: Supplementary file 1 [file bg-2021-106-supplement.zip › SupplementaryData.xlsx]

## Sheet: Supplementary Data 1
Suppl. Data 1	Riverine Cr data
River	Latitude (°N)	Longitude (°E)	Discharge (km3/yr)	[Cr] (nmol/kg)
Acheloos	38.33	21.1	5.7	22.2
Alna	59.8961	10.7555	0.063072	22.8846
Alta	69.969	23.37	2.94231	9.80769
Amazon	0.7	-50.09	6469.2	0.8
Apalachicola	29.73	-84.98	20.1	81.54
Arno	43.68	10.28	0.9	15.385
Avon	51.5	-2.72	0.6	36.51
Barduelva	69.045	18.619	1.51373	2.88462
Beiarelva	67.03	14.58	1.5768	7.98077
Bhagirathi	30.14	78.598	8.2	18.3
Brahmani	22.245	84.78	714.3	5.8
Colorado	31.82	-114.8	11.9	43.41
Columbia	46.24	-124.06	168.8	48.42
Congo	-6.08	12.45	1233.9	9.63
Connecticut	41.27	-72.33	2.9	2.7
Dee	57.14	-2.07	0.9	93.72
Delaware	39.43	-75.53	10.6	82.2
Drammenselva	59.731	10.23	12.1792	4.13462
Driva	62.667	8.57	1.35605	3.26923
Evrotas	36.8	22.69	0.8	72.93
Exe	50.61	-3.43	0.5	20.69
Figgjoelva	58.811	5.547	0.15768	7.30769
Fraser (Can.)	49.17	-123.21	114.5	40.4
Ganges	22.4	90.98	507.7	46.2
Gaula	63.34	10.22	2.39674	9.61538
Glomma	59.2031	10.949	28.4833	9.61538
Humber	49.2	-58.25	7.884	15.3846
Ishikari	43.26	141.37	12.2	96.15
Jølstra	61.458	5.83	1.41912	2.59615
Jostedøla	61.396	7.29	1.70294	17.5962
Kiso	35.03	136.74	11.9	19.23
Koksoak	58.53	-68.15	54	4.95
Kvina	58.272	6.889	2.3652	2.59615
Lyngdalselva	58.14	7.036	1.16683	3.55769
Maas	51.71	4.66	7.9	30.37
Mackenzie	69.19	-135.02	284	7.21
Målselv	69.269	18.51	1.67141	2.59615
Mandalselva	58.019	7.455	3.40589	1.63462
Mississippi	29.15	-89.25	511.9	2
Namsen	64.457	11.5	0.883008	7.5
Nausta	61.507	5.718	0.536112	2.59615
Nestos	40.84	24.8	3.1	30.13
Nidelva(Rykene)	58.434	8.713	4.60426	2.40385
Nidelva(Tr.heim)	63.442	10.41	1.9237	2.21154
Niger	5.31	6.41	28.6	8.65
Numedalslagen	59.037	10.05	4.39296	5.38462
Ob	66.53	71.39	425.7	8.1
Orinoco	8.56	-60.5	1100	4.81
Orkla	63.318	9.83	1.18575	5.67308
Otra	58.144	8.013	6.14321	4.42308
Ouse	53.7	-0.69	2	7.82
Oyapock	4.28	-51.62	26.5	9.97
Parana	-33.94	-58.4	469.6	50
Pasvikelva	69.707	30.1	3.72125	4.80769
Pearl	22.08	113.77	212.9	64.6
Po	44.95	12.43	46	21.15
Potomac	37.99	-76.24	9.7	92.03
Ranelva	66.33	14.13	6.18106	5.57692
Rhine	51.98	4.08	69.4	35.3
RioGrande	25.95	-97.14	1.1	44.04
Sacramento	38.06	-121.85	21.2	2.7
Scheldt	51.43	3.52	1.2	19.23
Sev Dvina	64.77	39.89	112	21.1538
Shinano	37.94	139.06	8.9	38.46
Shonai	34.75	136.75	0.889631	5.76923
Sira	58.292	6.44	4.03661	1.15385
Skienselva	59.121	9.61	11.0061	2.30769
St_Lawrence	49.5	-64.5	216.4	13.5
Stjørdalselva	63.447	10.9	1.32451	11.8269
Strymonas	40.78	23.84	4.1	63.42
Suldalslågen	59.481	6.24	2.68056	2.78846
Surna	62.973	8.66	1.10376	4.32692
Susquehanna	39.54	-76.07	30.8	90.27
Tanaelva	70.519	28.37	3.27974	7.30769
Thames	51.49	0.6	2.5	8.07
Tista utlop Femsjoen	59.05	11.4	0.662256	11.7308
Tone	35.74	140.85	4.5	96.15
Tovdalselva	58.193	8.069	2.83824	5.57692
Tweed	55.76	-1.98	1	19.41
Uruguay	-34.2	-58.3	173.4	14.3
Vefsna	65.845	13.18	4.72409	4.51923
Verdalselva	63.8	11.43	0.914544	4.03846
Vosso	60.64	5.95	3.13152	4.13462
Yangtzee	31.25	122.03	710	76.92
Yellow	37.74	119.13	46.5	76.92
Yoshino	34.07	134.6	1.7	96.15
Yukon	62.59	-164.8	181.1	52.04

## Sheet: Supplementary Data 2
Suppl. Data 2	Observational database.
*If filter size was noted in publication, this is listed here instead of “Yes/No”.
Region	Cruise	Station	Latitude (°N)	Longitude (°E)	Depth (m)	δ53Cr	δ53Cr_err	[Cr] (nmol/kg)	[Cr(III)] (nmol/kg)	Filtered*	Reference
ETNP	TT145	2	21	-132	0				0.097561	No	Murray et al., 1983
ETNP	TT145	2	21	-132	25			3.19022	0	No	Murray et al., 1983
ETNP	TT145	2	21	-132	50			3.13206	0.204878	No	Murray et al., 1983
ETNP	TT145	2	21	-132	75				0	No	Murray et al., 1983
ETNP	TT145	2	21	-132	100			3.42432	0.097561	No	Murray et al., 1983
ETNP	TT145	2	21	-132	150				0	No	Murray et al., 1983
ETNP	TT145	2	21	-132	200			3.60812	0.097561	No	Murray et al., 1983
ETNP	TT145	2	21	-132	250				0	No	Murray et al., 1983
ETNP	TT145	2	21	-132	300			3.49896	0.0878049	No	Murray et al., 1983
ETNP	TT145	2	21	-132	400				0.0682927	No	Murray et al., 1983
ETNP	TT145	2	21	-132	500			3.58673	0.0780488	No	Murray et al., 1983
ETNP	TT145	2	21	-132	600				0.195122	No	Murray et al., 1983
ETNP	TT145	2	21	-132	700				0.097561	No	Murray et al., 1983
ETNP	TT145	2	21	-132	800				0.204878	No	Murray et al., 1983
ETNP	TT145	2	21	-132	900			4.38535	0.17561	No	Murray et al., 1983
ETNP	TT145	2	21	-132	1000			4.45726	0.380488	No	Murray et al., 1983
ETNP	TT145	2	21	-132	2000			4.65832	0.390244	No	Murray et al., 1983
ETNP	TT145	2	21	-132	3500			4.24437	0.0682927	No	Murray et al., 1983
ETNP	TT145	2	21	-132	4600				0.185366	No	Murray et al., 1983
ETNP	TT145	2	21	-132	4800			4.48935		No	Murray et al., 1983
ETNP	TT145	2	21	-132	5000			4.37492	0.107317	No	Murray et al., 1983
ETNP	TT145	4	21.4767	-126.595	0				0.0585366	No	Murray et al., 1983
ETNP	TT145	4	21.4767	-126.595	25			3.06581	0.0292683	No	Murray et al., 1983
ETNP	TT145	4	21.4767	-126.595	50			2.76553	0.243902	No	Murray et al., 1983
ETNP	TT145	4	21.4767	-126.595	75			2.92645	0.17561	No	Murray et al., 1983
ETNP	TT145	4	21.4767	-126.595	100			3.00234	0.273171	No	Murray et al., 1983
ETNP	TT145	4	21.4767	-126.595	150			2.47942	0.136585	No	Murray et al., 1983
ETNP	TT145	4	21.4767	-126.595	200			2.51247	0.136585	No	Murray et al., 1983
ETNP	TT145	4	21.4767	-126.595	250				0.136585	No	Murray et al., 1983
ETNP	TT145	4	21.4767	-126.595	300			2.60501	0.136585	No	Murray et al., 1983
ETNP	TT145	4	21.4767	-126.595	400			2.64127	0.487805	No	Murray et al., 1983
ETNP	TT145	4	21.4767	-126.595	500			2.80208	0.643902	No	Murray et al., 1983
ETNP	TT145	4	21.4767	-126.595	600			3.82886	0.331707	No	Murray et al., 1983
ETNP	TT145	4	21.4767	-126.595	700				0.214634	No	Murray et al., 1983
ETNP	TT145	4	21.4767	-126.595	800			4.02139	0.243902	No	Murray et al., 1983
ETNP	TT145	4	21.4767	-126.595	900				0.478049	No	Murray et al., 1983
ETNP	TT145	4	21.4767	-126.595	1000			4.4377	0.458537	No	Murray et al., 1983
ETNP	TT145	4	21.4767	-126.595	2000				0.536585	No	Murray et al., 1983
ETNP	TT145	4	21.4767	-126.595	2800			4.08476	0.22439	No	Murray et al., 1983
ETNP	TT145	4	21.4767	-126.595	3100			4.18391	0.22439	No	Murray et al., 1983
ETNP	TT145	4	21.4767	-126.595	3700			4.03417	0.156098	No	Murray et al., 1983
ETNP	TT145	4	21.4767	-126.595	4000			4.11061	0.117073	No	Murray et al., 1983
ETNP	TT145	5	23.485	-117.022	0				0.253659	No	Murray et al., 1983
ETNP	TT145	5	23.485	-117.022	25				0.136585	No	Murray et al., 1983
ETNP	TT145	5	23.485	-117.022	50			2.45293	0.302439	No	Murray et al., 1983
ETNP	TT145	5	23.485	-117.022	75			2.63225	0.302439	No	Murray et al., 1983
ETNP	TT145	5	23.485	-117.022	100			2.62342	0.185366	No	Murray et al., 1983
ETNP	TT145	5	23.485	-117.022	150				0.253659	No	Murray et al., 1983
ETNP	TT145	5	23.485	-117.022	250				0.302439	No	Murray et al., 1983
ETNP	TT145	5	23.485	-117.022	300			2.55073	0.390244	No	Murray et al., 1983
ETNP	TT145	5	23.485	-117.022	400				1.05366	No	Murray et al., 1983
ETNP	TT145	5	23.485	-117.022	500				0.731707	No	Murray et al., 1983
ETNP	TT145	5	23.485	-117.022	600			2.69836	0.965854	No	Murray et al., 1983
ETNP	TT145	5	23.485	-117.022	800				0.253659	No	Murray et al., 1983
ETNP	TT145	5	23.485	-117.022	900			2.95689	0.643902	No	Murray et al., 1983
ETNP	TT145	5	23.485	-117.022	1500				0.35122	No	Murray et al., 1983
ETNP	TT145	5	23.485	-117.022	2000			4.1866		No	Murray et al., 1983
ETNP	TT145	5	23.485	-117.022	2500			4.66708	0.253659	No	Murray et al., 1983
ETNP	TT145	5	23.485	-117.022	2800			4.67623	0.273171	No	Murray et al., 1983
ETNP	TT145	5	23.485	-117.022	3500				0.234146	No	Murray et al., 1983
ETNP	TT145	5	23.485	-117.022	3700			4.31618	0.22439	No	Murray et al., 1983
ETNP	TT145	5	23.485	-117.022	4000			4.31765		No	Murray et al., 1983
ETNP	TT145	6	24.2833	-114.983	0				0.243902	No	Murray et al., 1983
ETNP	TT145	6	24.2833	-114.983	25			2.47107	0.165854	No	Murray et al., 1983
ETNP	TT145	6	24.2833	-114.983	50				0.0682927	No	Murray et al., 1983
ETNP	TT145	6	24.2833	-114.983	75			2.56678	0.263415	No	Murray et al., 1983
ETNP	TT145	6	24.2833	-114.983	100			2.30878	0.185366	No	Murray et al., 1983
ETNP	TT145	6	24.2833	-114.983	150			2.35386	0.419512	No	Murray et al., 1983
ETNP	TT145	6	24.2833	-114.983	200			2.00154	0.360976	No	Murray et al., 1983
ETNP	TT145	6	24.2833	-114.983	250			2.11374	0.57561	No	Murray et al., 1983
ETNP	TT145	6	24.2833	-114.983	300			2.59538	0.380488	No	Murray et al., 1983
ETNP	TT145	6	24.2833	-114.983	400			2.46925	0.243902	No	Murray et al., 1983
ETNP	TT145	6	24.2833	-114.983	500			2.74138	0.419512	No	Murray et al., 1983
ETNP	TT145	6	24.2833	-114.983	600			2.50446	0.195122	No	Murray et al., 1983
ETNP	TT145	6	24.2833	-114.983	700			3.36466	0.156098	No	Murray et al., 1983
ETNP	TT145	6	24.2833	-114.983	750				0.165854	No	Murray et al., 1983
ETNP	TT145	6	24.2833	-114.983	800			2.80952	0.165854	No	Murray et al., 1983
ETNP	TT145	6	24.2833	-114.983	850			3.55738	0.165854	No	Murray et al., 1983
ETNP	TT145	6	24.2833	-114.983	900			3.4105	0.107317	No	Murray et al., 1983
ETNP	TT145	6	24.2833	-114.983	1000			3.52304	0.243902	No	Murray et al., 1983
ETNP	TT145	6	24.2833	-114.983	1100			3.85599	0.0682927	No	Murray et al., 1983
ETNP	TT145	6	24.2833	-114.983	1200			4.01262	0.117073	No	Murray et al., 1983
ETNP	TT145	6	24.2833	-114.983	1300			4.14503	0.156098	No	Murray et al., 1983
ETNP	TT145	6	24.2833	-114.983	1400			4.19383	0.107317	No	Murray et al., 1983
ETNP	TT145	6	24.2833	-114.983	2500			4.21947	0.234146	No	Murray et al., 1983
ETNP	TT145	6	24.2833	-114.983	3100			4.35548		No	Murray et al., 1983
ETNP	TT145	6	24.2833	-114.983	3800			4.58284	0.097561	No	Murray et al., 1983
ETNP	TT145	7	24.6983	-114.107	0			2.95047	0.165854	No	Murray et al., 1983
ETNP	TT145	7	24.6983	-114.107	25			2.74242	0.0878049	No	Murray et al., 1983
ETNP	TT145	7	24.6983	-114.107	50			2.61771	0.234146	No	Murray et al., 1983
ETNP	TT145	7	24.6983	-114.107	75			2.20923		No	Murray et al., 1983
ETNP	TT145	7	24.6983	-114.107	100			2.45109	0.17561	No	Murray et al., 1983
ETNP	TT145	7	24.6983	-114.107	150			1.9626	0.273171	No	Murray et al., 1983
ETNP	TT145	7	24.6983	-114.107	200			2.44223	0.282927	No	Murray et al., 1983
ETNP	TT145	7	24.6983	-114.107	250			1.35635	0.341463	No	Murray et al., 1983
ETNP	TT145	7	24.6983	-114.107	300			2.35843	0.546341	No	Murray et al., 1983
ETNP	TT145	7	24.6983	-114.107	400			2.78175	0.497561	No	Murray et al., 1983
ETNP	TT145	7	24.6983	-114.107	500			3.11143	0.439024	No	Murray et al., 1983
ETNP	TT145	7	24.6983	-114.107	700			3.62189	0.156098	No	Murray et al., 1983
ETNP	TT145	7	24.6983	-114.107	800				0.0585366	No	Murray et al., 1983
ETNP	TT145	7	24.6983	-114.107	900			3.92588	0.097561	No	Murray et al., 1983
ETNP	TT145	7	24.6983	-114.107	1000			4.13889	0.273171	No	Murray et al., 1983
ETNP	TT145	7	24.6983	-114.107	1200			4.05201		No	Murray et al., 1983
ETNP	TT145	7	24.6983	-114.107	1500			4.27043	0.263415	No	Murray et al., 1983
ETNP	TT145	7	24.6983	-114.107	2000			4.35551	0.0292683	No	Murray et al., 1983
ETNP	TT145	7	24.6983	-114.107	3000			4.28981	0.165854	No	Murray et al., 1983
North Pacific	GEO-HY	3-5-8	11.8333	-103.833	189			2.67		No	Jeandel & Minster, 1987
North Pacific	GEO-HY	3-5-8	11.8333	-103.833	261			2.16		0.45 um	Jeandel & Minster, 1987
North Pacific	GEO-HY	3-5-8	11.8333	-103.833	354			2.33		No	Jeandel & Minster, 1987
North Pacific	GEO-HY	3-5-8	11.8333	-103.833	556			2.49		0.45 um	Jeandel & Minster, 1987
North Pacific	GEO-HY	3-5-8	11.8333	-103.833	708			2.4		0.45 um	Jeandel & Minster, 1987
North Pacific	GEO-HY	3-5-8	11.8333	-103.833	961			2.56		0.45 um	Jeandel & Minster, 1987
North Pacific	GEO-HY	3-5-8	11.8333	-103.833	1057			3.6		No	Jeandel & Minster, 1987
North Pacific	GEO-HY	3-5-8	11.8333	-103.833	1555			3.64		No	Jeandel & Minster, 1987
North Pacific	GEO-HY	3-5-8	11.8333	-103.833	2026			3.74		No	Jeandel & Minster, 1987
North Pacific	GEO-HY	3-5-8	11.8333	-103.833	2531			4.12		No	Jeandel & Minster, 1987
North Pacific	GEO-HY	3-5-8	11.8333	-103.833	2582			4.56		No	Jeandel & Minster, 1987
South Pacific	Searise I	HY5	2.43333	-102	2000			4.4		No	Jeandel & Minster, 1987
South Pacific	Searise I	HY5	2.43333	-102	2920			4.4		No	Jeandel & Minster, 1987
South Pacific	Searise I	HY5	2.43333	-102	3290			4.1		No	Jeandel & Minster, 1987
South Pacific	Searise II	HY1	-21.5667	-114.3	990			3		No	Jeandel & Minster, 1987
South Pacific	Searise II	HY1	-21.5667	-114.3	1790			2.9		No	Jeandel & Minster, 1987
South Pacific	Searise II	HY1	-21.5667	-114.3	2190			5		No	Jeandel & Minster, 1987
South Pacific	Searise II	HY1	-21.5667	-114.3	2290			4.9		No	Jeandel & Minster, 1987
South Pacific	Searise II	HY1	-21.5667	-114.3	2390			4.9		No	Jeandel & Minster, 1987
South Pacific	Searise II	HY1	-21.5667	-114.3	2490			5.2		No	Jeandel & Minster, 1987
South Pacific	Searise II	HY1	-21.5667	-114.3	2590			5.6		No	Jeandel & Minster, 1987
South Pacific	Searise II	HY1	-21.5667	-114.3	2690			4.3		No	Jeandel & Minster, 1987
South Pacific	Searise II	HY1	-21.5667	-114.3	2786			6.5		No	Jeandel & Minster, 1987
South Pacific	Searise II	HY2	-21.3833	-114.283	2190			4.7		No	Jeandel & Minster, 1987
South Pacific	Searise II	HY2	-21.3833	-114.283	2290			4.4		No	Jeandel & Minster, 1987
South Pacific	Searise II	HY2	-21.3833	-114.283	2390			4.9		No	Jeandel & Minster, 1987
South Pacific	Searise II	HY2	-21.3833	-114.283	2590			5.5		No	Jeandel & Minster, 1987
South Pacific	Searise II	HY2	-21.3833	-114.283	2630			5		No	Jeandel & Minster, 1987
South Pacific	Searise II	HY2	-21.3833	-114.283	2660			5.6		No	Jeandel & Minster, 1987
South Pacific	Searise II	HY2	-21.3833	-114.283	2690			5.7		No	Jeandel & Minster, 1987
NW Pacific	KH-87-4	8	45	145	0			2.83902		0.4 um	Isshiki et al., 1989
NW Pacific	KH-87-4	8	45	145	10			3.05366		0.4 um	Isshiki et al., 1989
NW Pacific	KH-87-4	8	45	145	20			3.07317		0.4 um	Isshiki et al., 1989
NW Pacific	KH-87-4	8	45	145	30			2.85854		0.4 um	Isshiki et al., 1989
NW Pacific	KH-87-4	8	45	145	50			3.00488		0.4 um	Isshiki et al., 1989
NW Pacific	KH-87-4	8	45	145	75			2.92683		0.4 um	Isshiki et al., 1989
NW Pacific	KH-87-4	8	45	145	100			3.30732		0.4 um	Isshiki et al., 1989
NW Pacific	KH-87-4	8	45	145	150			2.96585		0.4 um	Isshiki et al., 1989
NW Pacific	KH-87-4	8	45	145	300			2.81951		0.4 um	Isshiki et al., 1989
NW Pacific	KH-87-4	8	45	145	500			3.00488		0.4 um	Isshiki et al., 1989
NW Pacific	KH-87-4	8	45	145	1000			3.43415		0.4 um	Isshiki et al., 1989
NW Pacific	KH-87-4	8	45	145	2000			4.02927		0.4 um	Isshiki et al., 1989
NW Pacific	KH-87-4	8	45	145	3000			4.52683		0.4 um	Isshiki et al., 1989
NW Pacific	KH-87-4	8	45	145	4000			4.42927		0.4 um	Isshiki et al., 1989
NE Pacific	CSS Endeavour Oct-91	P26	50	-145	10			2.58537	0.0565854	Yes	Mugo, 1997 (PhD thesis)
NE Pacific	CSS Endeavour Oct-91	P26	50	-145	50			2.67317	0.0517073	Yes	Mugo, 1997 (PhD thesis)
NE Pacific	CSS Endeavour Oct-91	P26	50	-145	100			2.84878	0.0468293	Yes	Mugo, 1997 (PhD thesis)
NE Pacific	CSS Endeavour Oct-91	P26	50	-145	200			2.69268	0.062439	Yes	Mugo, 1997 (PhD thesis)
NE Pacific	CSS Endeavour Oct-91	P26	50	-145	300			3.13171	0.0790244	Yes	Mugo, 1997 (PhD thesis)
NE Pacific	CSS Endeavour Oct-91	P26	50	-145	400				0.0790244	Yes	Mugo, 1997 (PhD thesis)
NE Pacific	CSS Endeavour Oct-91	P26	50	-145	500			3.12195		Yes	Mugo, 1997 (PhD thesis)
NE Pacific	CSS Endeavour Oct-91	P26	50	-145	600			3.97073	0.0731707	Yes	Mugo, 1997 (PhD thesis)
NE Pacific	CSS Endeavour Oct-91	P26	50	-145	1000			3.85366		Yes	Mugo, 1997 (PhD thesis)
NE Pacific	CSS Endeavour Oct-91	P26	50	-145	1500				0.0243902	Yes	Mugo, 1997 (PhD thesis)
NE Pacific	CSS Endeavour Oct-91	P26	50	-145	2000				0.0653659	Yes	Mugo, 1997 (PhD thesis)
NE Pacific	CSS Endeavour Oct-91	P26	50	-145	3500				0.0965854	Yes	Mugo, 1997 (PhD thesis)
NE Pacific	CSS Endeavour Oct-91	P26	50	-145	4000			4.21463		Yes	Mugo, 1997 (PhD thesis)
NE Pacific	CSS Endeavour Oct-91	P26	50	-145	20				0.152195	Yes	Mugo, 1997 (PhD thesis)
NE Pacific	CSS Endeavour Oct-91	P20	49.566	-138.667	50			2.77073	0.0282927	Yes	Mugo, 1997 (PhD thesis)
NE Pacific	CSS Endeavour Oct-91	P20	49.566	-138.667	100			2.56585	0.0770732	Yes	Mugo, 1997 (PhD thesis)
NE Pacific	CSS Endeavour Oct-91	P20	49.566	-138.667	200			2.45854	0.0868293	Yes	Mugo, 1997 (PhD thesis)
NE Pacific	CSS Endeavour Oct-91	P20	49.566	-138.667	300			2.8878	0.0702439	Yes	Mugo, 1997 (PhD thesis)
NE Pacific	CSS Endeavour Oct-91	P20	49.566	-138.667	400			3.26829	0.195122	Yes	Mugo, 1997 (PhD thesis)
NE Pacific	CSS Endeavour Oct-91	P20	49.566	-138.667	500			2.78049	0.131707	Yes	Mugo, 1997 (PhD thesis)
NE Pacific	CSS Endeavour Oct-91	P20	49.566	-138.667	600			2.91707	0.132683	Yes	Mugo, 1997 (PhD thesis)
NE Pacific	CSS Endeavour Oct-91	P20	49.566	-138.667	800			2.6439	0.0956098	Yes	Mugo, 1997 (PhD thesis)
NE Pacific	CSS Endeavour Oct-91	P20	49.566	-138.667	1000			3.42439	0.0809756	Yes	Mugo, 1997 (PhD thesis)
NE Pacific	CSS Endeavour Oct-91	P20	49.566	-138.667	1200			4.02927	0.141463	Yes	Mugo, 1997 (PhD thesis)
NE Pacific	CSS Endeavour Oct-91	P20	49.566	-138.667	1500				0.169756	Yes	Mugo, 1997 (PhD thesis)
ETNP	NA	Vertex III	15	-107	10				0.016	No	Rue et al., 1997
ETNP	NA	Vertex III	15	-107	20			3.041	0.021	No	Rue et al., 1997
ETNP	NA	Vertex III	15	-107	30			2.761	0.011	No	Rue et al., 1997
ETNP	NA	Vertex III	15	-107	40			1.98	0.01	No	Rue et al., 1997
ETNP	NA	Vertex III	15	-107	50			1.899	0.019	No	Rue et al., 1997
ETNP	NA	Vertex III	15	-107	60			2.113	0.013	No	Rue et al., 1997
ETNP	NA	Vertex III	15	-107	70			2.365	0.035	No	Rue et al., 1997
ETNP	NA	Vertex III	15	-107	80			2.399	0.049	No	Rue et al., 1997
ETNP	NA	Vertex III	15	-107	100			1.942	0.162	No	Rue et al., 1997
ETNP	NA	Vertex III	15	-107	120			2.073	0.273	No	Rue et al., 1997
ETNP	NA	Vertex III	15	-107	140			2.503	0.363	No	Rue et al., 1997
ETNP	NA	Vertex III	15	-107	160				0.378	No	Rue et al., 1997
ETNP	NA	Vertex III	15	-107	200			2.94	0.66	No	Rue et al., 1997
ETNP	NA	Vertex III	15	-107	250			3.048	0.708	No	Rue et al., 1997
ETNP	NA	Vertex III	15	-107	300			3.192	0.732	No	Rue et al., 1997
ETNP	NA	Vertex III	15	-107	400			2.784	0.544	No	Rue et al., 1997
ETNP	NA	Vertex III	15	-107	500			2.672	0.362	No	Rue et al., 1997
ETNP	NA	Vertex III	15	-107	600			2.733	0.253	No	Rue et al., 1997
ETNP	NA	Vertex III	15	-107	700			2.509	0.129	No	Rue et al., 1997
ETNP	NA	Vertex III	15	-107	800			3.19	0.1	No	Rue et al., 1997
ETNP	NA	Vertex III	15	-107	900			2.64	0.09	No	Rue et al., 1997
ETNP	NA	Vertex III	15	-107	1000			3.556	0.056	No	Rue et al., 1997
ETNP	NA	Vertex III	15	-107	1250			4.296	0.006	No	Rue et al., 1997
ETNP	NA	Vertex III	15	-107	1500			4.255	0.005	No	Rue et al., 1997
ETNP	NA	Vertex III	15	-107	2000			4.38	0	No	Rue et al., 1997
NE Pacific	NA	PAPA	50	-145	1000	0.61	0.06	4.38494		Yes	Scheiderich et al., 2015
NE Pacific	GT IC 2	SAFe	30	-140	0	1.01	0.06	3.16		0.2 um	Moos & Boyle, 2019
NE Pacific	GT IC 2	SAFe	30	-140	25	1.05	0.06	3.17		0.2 um	Moos & Boyle, 2019
NE Pacific	GT IC 2	SAFe	30	-140	100	1.08	0.06	3.19		0.2 um	Moos & Boyle, 2019
NE Pacific	GT IC 2	SAFe	30	-140	200	1.11	0.06	3.17		0.2 um	Moos & Boyle, 2019
NE Pacific	GT IC 2	SAFe	30	-140	350	1.08	0.06	3.24		0.2 um	Moos & Boyle, 2019
NE Pacific	GT IC 2	SAFe	30	-140	500	1	0.06	3.38		0.2 um	Moos & Boyle, 2019
NE Pacific	GT IC 2	SAFe	30	-140	750	0.89	0.06	3.74		0.2 um	Moos & Boyle, 2019
NE Pacific	GT IC 2	SAFe	30	-140	1000	0.84	0.06	4.13		0.2 um	Moos & Boyle, 2019
NE Pacific	GT IC 2	SAFe	30	-140	1500	0.73	0.06	4.5		0.2 um	Moos & Boyle, 2019
NE Pacific	GT IC 2	SAFe	30	-140	2000	0.71	0.06	4.51		0.2 um	Moos & Boyle, 2019
NE Pacific	GT IC 2	SAFe	30	-140	3000	0.7	0.06	4.77		0.2 um	Moos & Boyle, 2019
NE Pacific	GT IC 2	SAFe	30	-140	4000	0.74	0.06	4.65		0.2 um	Moos & Boyle, 2019
NE Pacific	GT IC 2	SAFe	30	-140	4500	0.68	0.06	4.51		0.2 um	Moos & Boyle, 2019
South Pacific	MV1015	7	-26.25	-103.96	100	0.9725	0.06	3.295		0.2 um	Moos & Boyle, 2019
NE Pacific	KM1713	1	55	-147.216	10	1.088	0.013	3.09	0.26	0.2 um	Janssen et al., 2020
NE Pacific	KM1713	1	55	-147.216	30	1.107	0.023	3.14	0.39	0.2 um	Janssen et al., 2020
NE Pacific	KM1713	1	55	-147.216	50	1.084	0.028	3.17	0.29	0.2 um	Janssen et al., 2020
NE Pacific	KM1713	1	55	-147.216	100	1.038	0.04	3.24	0.27	0.2 um	Janssen et al., 2020
NE Pacific	KM1713	1	55	-147.216	150	1.037	0.036	3.4	0.29	0.2 um	Janssen et al., 2020
NE Pacific	KM1713	1	55	-147.216	200	1.048	0.029	3.46	0.51	0.2 um	Janssen et al., 2020
NE Pacific	KM1713	2	50.0017	-145	10	1.086	0.012	3.03	0.26	0.2 um	Janssen et al., 2020
NE Pacific	KM1713	2	50.0017	-145	30	1.115	0.029	3.07	0.23	0.2 um	Janssen et al., 2020
NE Pacific	KM1713	2	50.0017	-145	50	1.091	0.017	3.08	0.22	0.2 um	Janssen et al., 2020
NE Pacific	KM1713	2	50.0017	-145	75	1.096	0.025	3.11	0.23	0.2 um	Janssen et al., 2020
NE Pacific	KM1713	2	50.0017	-145	100	1.087	0.035	3.11	0.19	0.2 um	Janssen et al., 2020
NE Pacific	KM1713	2	50.0017	-145	150				0.2	0.2 um	Janssen et al., 2020
NE Pacific	KM1713	2	50.0017	-145	200	1.076	0.027	3.17	0.2	0.2 um	Janssen et al., 2020
NE Pacific	KM1713	3	46	-158	10	1.092	0.015	3.08	0.19	0.2 um	Janssen et al., 2020
NE Pacific	KM1713	3	46	-158	30	1.077	0.027	3.1	0.24	0.2 um	Janssen et al., 2020
NE Pacific	KM1713	3	46	-158	50	1.093	0.027	3.14	0.18	0.2 um	Janssen et al., 2020
NE Pacific	KM1713	3	46	-158	75	1.082	0.015	3.12	0.24	0.2 um	Janssen et al., 2020
NE Pacific	KM1713	3	46	-158	100	1.077	0.028	3.12	0.16	0.2 um	Janssen et al., 2020
NE Pacific	KM1713	3	46	-158	150	1.104	0.028	3.15	0.28	0.2 um	Janssen et al., 2020
NE Pacific	KM1713	3	46	-158	200	1.078	0.023	3.19	0.15	0.2 um	Janssen et al., 2020
NE Pacific	KM1713	4	41.9972	-158.008	10	1.119	0.017	3	0.17	0.2 um	Janssen et al., 2020
NE Pacific	KM1713	4	41.9972	-158.008	30	1.143	0.025	3.05	0.22	0.2 um	Janssen et al., 2020
NE Pacific	KM1713	4	41.9972	-158.008	50	1.124	0.017	3.01	0.15	0.2 um	Janssen et al., 2020
NE Pacific	KM1713	4	41.9972	-158.008	75	1.118	0.029	3.04	0.15	0.2 um	Janssen et al., 2020
NE Pacific	KM1713	4	41.9972	-158.008	100	1.121	0.034	3	0.16	0.2 um	Janssen et al., 2020
NE Pacific	KM1713	4	41.9972	-158.008	150	1.122	0.037	3.05	0.1	0.2 um	Janssen et al., 2020
NE Pacific	KM1713	4	41.9972	-158.008	200	1.105	0.029	3.04	0.12	0.2 um	Janssen et al., 2020
NE Pacific	KM1713	5	34	-158	10	1.15	0.015	3.02	0.09	0.2 um	Janssen et al., 2020
NE Pacific	KM1713	5	34	-158	30	1.092	0.045	3.01	0.1	0.2 um	Janssen et al., 2020
NE Pacific	KM1713	5	34	-158	50				0.09	0.2 um	Janssen et al., 2020
NE Pacific	KM1713	5	34	-158	75	1.131	0.027	3.02	0.26	0.2 um	Janssen et al., 2020
NE Pacific	KM1713	5	34	-158	90	1.134	0.017	3.05	0.1	0.2 um	Janssen et al., 2020
NE Pacific	KM1713	5	34	-158	150	1.066	0.041	3.09	0.08	0.2 um	Janssen et al., 2020
NE Pacific	KM1713	5	34	-158	200	1.131	0.016	3.07	0.09	0.2 um	Janssen et al., 2020
NE Pacific	KM1713	5	34	-158	300	1.076	0.05	2.96	0.08	0.2 um	Janssen et al., 2020
NE Pacific	KM1713	5	34	-158	400	1.047	0.04	2.9	0.13	0.2 um	Janssen et al., 2020
NE Pacific	KM1713	5	34	-158	600	1.042	0.041	3.48	0.1	0.2 um	Janssen et al., 2020
NE Pacific	KM1713	5	34	-158	800	0.956	0.058	3.7	0.15	0.2 um	Janssen et al., 2020
NE Pacific	KM1713	5	34	-158	1000	0.938	0.038	3.83	0.12	0.2 um	Janssen et al., 2020
NE Pacific	KM1713	6	24.1672	-160.254	10	1.148	0.017	2.98	0.1	0.2 um	Janssen et al., 2020
NE Pacific	KM1713	6	24.1672	-160.254	100	1.141	0.024	3.04	0.07	0.2 um	Janssen et al., 2020
ETNP	NH1410	2T	18.9	-108.8	5	1.09	0.06	2.78		No	Moos et al., 2020
ETNP	NH1410	2T	18.9	-108.8	100	1.18	0.06	2.27		No	Moos et al., 2020
ETNP	NH1410	2T	18.9	-108.8	200	1.14	0.06	2.66		No	Moos et al., 2020
ETNP	NH1410	2T	18.9	-108.8	250	1.09	0.06	2.72		No	Moos et al., 2020
ETNP	NH1410	2T	18.9	-108.8	300	1.19	0.06	2.73		No	Moos et al., 2020
ETNP	NH1410	2T	18.9	-108.8	400	1.04	0.06	3.07		No	Moos et al., 2020
ETNP	NH1410	2T	18.9	-108.8	500	0.99	0.06	3.21		No	Moos et al., 2020
ETNP	NH1410	2T	18.9	-108.8	600	0.93	0.06	3.36		No	Moos et al., 2020
ETNP	NH1410	2T	18.9	-108.8	800	0.78	0.06	4.01		No	Moos et al., 2020
ETNP	NH1410	7T	18.2	-104.2	5	1.07	0.06	2.84		No	Moos et al., 2020
ETNP	NH1410	7T	18.2	-104.2	100	1.16	0.06	2.72		No	Moos et al., 2020
ETNP	NH1410	7T	18.2	-104.2	200	1.08	0.06	3.03		No	Moos et al., 2020
ETNP	NH1410	7T	18.2	-104.2	250	1.04	0.06	3.08		No	Moos et al., 2020
ETNP	NH1410	7T	18.2	-104.2	300	1.06	0.06	3.03		No	Moos et al., 2020
ETNP	NH1410	7T	18.2	-104.2	400	1.02	0.06	2.87		No	Moos et al., 2020
ETNP	NH1410	7T	18.2	-104.2	600	1.03	0.06	3.38		No	Moos et al., 2020
ETNP	NH1410	7T	18.2	-104.2	800	0.91	0.06	3.8		No	Moos et al., 2020
Santa Barbara	MV1405	29	34.23	-120.03	15	1	0.06	3.06		0.2 um	Moos et al., 2020
Santa Barbara	MV1405	29	34.23	-120.03	100	1	0.06	2.78		0.2 um	Moos et al., 2020
Santa Barbara	MV1405	29	34.23	-120.03	200	1.06	0.06	3		0.2 um	Moos et al., 2020
Santa Barbara	MV1405	29	34.23	-120.03	350	1.07	0.06	2.94		0.2 um	Moos et al., 2020
Santa Barbara	MV1405	29	34.23	-120.03	465	1.17	0.06	2.55		0.2 um	Moos et al., 2020
Santa Barbara	MV1405	29	34.23	-120.03	520	1.26	0.06	2.42		0.2 um	Moos et al., 2020
Santa Barbara	MV1405	29	34.23	-120.03	545	1.43	0.06	1.96		0.2 um	Moos et al., 2020
Santa Barbara	MV1405	29	34.23	-120.03	570	1.34	0.06	1.79		0.2 um	Moos et al., 2020
ETSP	M77	2	-9.922	-80.224	2	1.09	0.03	2.94		0.45 um	Nasemann et al. 2020
ETSP	M77	2	-9.922	-80.224	102	1.15	0.03	3.09		0.45 um	Nasemann et al. 2020
ETSP	M77	2	-9.922	-80.224	999	0.86	0.03	4.23		0.45 um	Nasemann et al. 2020
ETSP	M77	19	-12.363	-77	2	0.92	0.03	2.14		0.45 um	Nasemann et al. 2020
ETSP	M77	19	-12.363	-77	97	1.04	0.05	2.17		0.45 um	Nasemann et al. 2020
ETSP	M77	22	-13.666	-76.785	3	1.16	0.03	2.55		0.45 um	Nasemann et al. 2020
ETSP	M77	22	-13.666	-76.785	153	1.3	0.03	2.7		0.45 um	Nasemann et al. 2020
ETSP	M77	22	-13.666	-76.785	302	1.18	0.03	3.05		0.45 um	Nasemann et al. 2020
ETSP	M77	28	-15.999	-76.998	8	1.07	0.04	2.93		0.45 um	Nasemann et al. 2020
ETSP	M77	28	-15.999	-76.998	201	1.25	0.03	2.86		0.45 um	Nasemann et al. 2020
ETSP	M77	28	-15.999	-76.998	1001	0.89	0.03	4.31		0.45 um	Nasemann et al. 2020
ETSP	M77	28	-15.999	-76.998	1800	0.79	0.03	4.94		0.45 um	Nasemann et al. 2020
ETSP	M77	41	-16.819	-72.841	2	1.06	0.07	2.91		0.45 um	Nasemann et al. 2020
ETSP	M77	41	-16.819	-72.841	100	1.24	0.04	2.52		0.45 um	Nasemann et al. 2020
ETSP	M77	41	-16.819	-72.841	250	1.14	0.05	2.54		0.45 um	Nasemann et al. 2020
ETSP	M77	103	-9	-85.833	2	1.11	0.03	2.96		0.45 um	Nasemann et al. 2020
ETSP	M77	103	-9	-85.833	151	1.09	0.03	3.22		0.45 um	Nasemann et al. 2020
ETSP	M77	103	-9	-85.833	221	1.08	0.03	3.3		0.45 um	Nasemann et al. 2020
ETSP	M77	103	-9	-85.833	800	0.91	0.03	3.95		0.45 um	Nasemann et al. 2020
ETSP	M77	103	-9	-85.833	1500	0.8	0.03	4.68		0.45 um	Nasemann et al. 2020
ETSP	M77	103	-9	-85.833	2501	0.73	0.03	5.22		0.45 um	Nasemann et al. 2020
ETSP	M77	103	-9	-85.833	4290	0.72	0.03	5.51		0.45 um	Nasemann et al. 2020
ETSP	M77	109	-3.583	-85.833	2	1.11	0.02	3.04		0.45 um	Nasemann et al. 2020
ETSP	M77	109	-3.583	-85.833	151	1.03	0.03	3.31		0.45 um	Nasemann et al. 2020
ETSP	M77	109	-3.583	-85.833	500	1.15	0.03	3.51		0.45 um	Nasemann et al. 2020
ETSP	M77	109	-3.583	-85.833	700	0.97	0.03	3.87		0.45 um	Nasemann et al. 2020
ETSP	M77	109	-3.583	-85.833	1500	0.83	0.03	4.56		0.45 um	Nasemann et al. 2020
ETSP	M77	109	-3.583	-85.833	3201	0.73	0.03	5.29		0.45 um	Nasemann et al. 2020
ETSP	M77	806	-8	-79.845	1	1.02	0.04	2.31		0.45 um	Nasemann et al. 2020
ETSP	M77	806	-8	-79.845	81	1.05	0.04	3.28		0.45 um	Nasemann et al. 2020
ETSP	M77	806	-8	-79.845	141	1.59	0.03	1.5		0.45 um	Nasemann et al. 2020
ETSP	M77	807	-10.001	-78.38	2	1.17	0.03	2.57		0.45 um	Nasemann et al. 2020
ETSP	M77	807	-10.001	-78.38	80	1.42	0.03	1.71		0.45 um	Nasemann et al. 2020
ETSP	M77	807	-10.001	-78.38	110	1.51	0.03	1.67		0.45 um	Nasemann et al. 2020
ETSP	M77	812	-9.999	-79.134	3	1.11	0.03	2.53		0.45 um	Nasemann et al. 2020
ETSP	M77	812	-9.999	-79.134	51	0.99	0.03	3.21		0.45 um	Nasemann et al. 2020
ETSP	M77	812	-9.999	-79.134	101	1.07	0.03	3.23		0.45 um	Nasemann et al. 2020
ETSP	M77	812	-9.999	-79.134	201	1.13	0.03	3.09		0.45 um	Nasemann et al. 2020
ETSP	M77	812	-9.999	-79.134	302	1.19	0.03	3.05		0.45 um	Nasemann et al. 2020
ETSP	M77/4	78	-14	-77.06	1500	0.81	0.04	5.09		0.45 um	Janssen et al., 2021
ETSP	M77/4	78	-14	-77.06	2000	0.72	0.04	5.26		0.45 um	Janssen et al., 2021
ETSP	M77/4	78	-14	-77.06	2500	0.74	0.03	5.47		0.45 um	Janssen et al., 2021
ETSP	M77/4	78	-14	-77.06	3000	0.69	0.03	5.57		0.45 um	Janssen et al., 2021
South Pacific	GP13	8	-30	160	1000	0.94	0.03	3.63		0.2 um	Janssen et al., 2021
South Pacific	GP13	13	-30	165	1500	0.91	0.02	4.27		0.2 um	Janssen et al., 2021
South Pacific	GP13	13	-30	165	3000	0.83	0.02	4.54		0.2 um	Janssen et al., 2021
South Pacific	GP13	13	-30	165	3200	0.9	0.03	4.53		0.2 um	Janssen et al., 2021
South Pacific	GP13	18	-30	170	1500	0.88	0.03	4.17		0.2 um	Janssen et al., 2021
South Pacific	GP13	18	-30	170	2900	0.79	0.03	4.57		0.2 um	Janssen et al., 2021
South Pacific	GP13	33	-32.5	-175	1500	0.86	0.02	4.14		0.2 um	Janssen et al., 2021
South Pacific	GP13	33	-32.5	-175	2500	0.78	0.02	4.69		0.2 um	Janssen et al., 2021
South Pacific	GP13	33	-32.5	-175	3000	0.84	0.02	4.58		0.2 um	Janssen et al., 2021
South Pacific	GP13	33	-32.5	-175	4000	0.88	0.03	4.13		0.2 um	Janssen et al., 2021
South Pacific	GP13	33	-32.5	-175	5000	0.91	0.03	4.11		0.2 um	Janssen et al., 2021
South Pacific	GP13	33	-32.5	-175	5400	0.91	0.03	4.1		0.2 um	Janssen et al., 2021
Subarct N Pac	Line P 2012-13	P26	50	-145	2500	0.86	0.03	4.46		0.2 um	Janssen et al., 2021
Subarct N Pac	Line P 2012-13	P26	50	-145	3000	0.87	0.04	4.5		0.2 um	Janssen et al., 2021
Subarct N Pac	Line P 2012-13	P26	50	-145	3500	0.84	0.03	4.52		0.2 um	Janssen et al., 2021
Subarct N Pac	Line P 2012-13	P26	50	-145	4000	0.83	0.05	4.54		0.2 um	Janssen et al., 2021
ETNP	1804-5	P2	16.8	-106.9	25	1.12	0.13	2.84	0.19	0.2 or 0.4 um	Huang et al., 2021
ETNP	1804-5	P2	16.8	-106.9	70	1.13	0.13	2.87	0.22	0.2 or 0.4 um	Huang et al., 2021
ETNP	1804-5	P2	16.8	-106.9	100	1.18	0.13	2.53	0.42	0.2 or 0.4 um	Huang et al., 2021
ETNP	1804-5	P2	16.8	-106.9	120	1.18	0.13	2.53	1.25	0.2 or 0.4 um	Huang et al., 2021
ETNP	1804-5	P2	16.8	-106.9	150	1.18	0.13	2.72	1.42	0.2 or 0.4 um	Huang et al., 2021
ETNP	1804-5	P2	16.8	-106.9	175	1.24	0.13	2.74	1.54	0.2 or 0.4 um	Huang et al., 2021
ETNP	1804-5	P2	16.8	-106.9	200	1.18	0.13	2.71	1.66	0.2 or 0.4 um	Huang et al., 2021
ETNP	1804-5	P2	16.8	-106.9	250	1.2	0.13	2.49	1.59	0.2 or 0.4 um	Huang et al., 2021
ETNP	1804-5	P2	16.8	-106.9	300	1.17	0.13	2.52	1.23	0.2 or 0.4 um	Huang et al., 2021
ETNP	1804-5	P2	16.8	-106.9	350	1.09	0.13	3.02	1.29	0.2 or 0.4 um	Huang et al., 2021
ETNP	1804-5	P2	16.8	-106.9	500	1.06	0.13	3.21	0.74	0.2 or 0.4 um	Huang et al., 2021
ETNP	1804-5	P2	16.8	-106.9	725	0.93	0.13	3.81	0.44	0.2 or 0.4 um	Huang et al., 2021
ETNP	1804-5	P2	16.8	-106.9	1000	0.8	0.13	4.14	0.3	0.2 or 0.4 um	Huang et al., 2021
ETNP	1804-5	P2	16.8	-106.9	1500	0.66	0.13	4.82		0.2 or 0.4 um	Huang et al., 2021
ETNP	1804-5	P2	16.8	-106.9	2000	0.66	0.13	4.96		0.2 or 0.4 um	Huang et al., 2021
ETNP	1804-5	P2	16.8	-106.9	2500	0.64	0.13	5.03		0.2 or 0.4 um	Huang et al., 2021
ETNP	1804-5	P2	16.8	-106.9	3000	0.6	0.13	5.01		0.2 or 0.4 um	Huang et al., 2021
ETNP	1804-5	P2	16.8	-106.9	3500	0.61	0.13	4.98		0.2 or 0.4 um	Huang et al., 2021
ETNP	1804-5	P1	20	-106	10	1.16	0.13	2.83		0.2 or 0.4 um	Huang et al., 2021
ETNP	1804-5	P1	20	-106	25	1.2	0.13	2.59		0.2 or 0.4 um	Huang et al., 2021
ETNP	1804-5	P1	20	-106	50	1.16	0.13	2.58		0.2 or 0.4 um	Huang et al., 2021
ETNP	1804-5	P1	20	-106	75	1.28	0.13	2.46		0.2 or 0.4 um	Huang et al., 2021
ETNP	1804-5	P1	20	-106	100	1.24	0.13	2.48		0.2 or 0.4 um	Huang et al., 2021
ETNP	1804-5	P1	20	-106	120	1.32	0.13	2.29		0.2 or 0.4 um	Huang et al., 2021
ETNP	1804-5	P1	20	-106	150	1.25	0.13	2.34		0.2 or 0.4 um	Huang et al., 2021
ETNP	1804-5	P1	20	-106	190	1.22	0.13	2.63		0.2 or 0.4 um	Huang et al., 2021
ETNP	1804-5	P1	20	-106	300	1.16	0.13	2.77		0.2 or 0.4 um	Huang et al., 2021
ETNP	1804-5	P1	20	-106	400	1.19	0.13	2.86		0.2 or 0.4 um	Huang et al., 2021
ETNP	1804-5	P1	20	-106	500	1.14	0.13	3.03		0.2 or 0.4 um	Huang et al., 2021
ETNP	1804-5	P1	20	-106	700	0.98	0.13	3.51		0.2 or 0.4 um	Huang et al., 2021
ETNP	1804-5	P1	20	-106	800	0.94	0.13	3.67		0.2 or 0.4 um	Huang et al., 2021
ETNP	NH1410	13F	20.9	-108	10	1.13	0.13	2.72	0.12	No	Huang et al., 2021
ETNP	NH1410	13F	20.9	-108	200	1.22	0.13	2.46	0.49	No	Huang et al., 2021
ETNP	NH1410	13F	20.9	-108	350	1.23	0.13	2.73	0.59	No	Huang et al., 2021
ETNP	NH1410	13F	20.9	-108	400	1.29	0.13	2.8	0.47	No	Huang et al., 2021
ETNP	NH1410	13F	20.9	-108	600	1.11	0.13	3.22	0.34	No	Huang et al., 2021
ETNP	NH1410	13F	20.9	-108	800	0.98	0.13	3.62	0.26	No	Huang et al., 2021
Tasman Sea	IN2018V04	PS3	-40.4	153.9	1000	0.88	0.02	3.31		0.2 um	Janssen et al., 2021
Tasman Sea	IN2018V04	PS3	-40.4	153.9	1250	0.82	0.02	3.96		0.2 um	Janssen et al., 2021
Tasman Sea	IN2018V04	TS8	-34.67	154.55	750	0.96	0.02	3.51		0.2 um	Janssen et al., 2021
Tasman Sea	IN2018V04	TS8	-34.67	154.55	1000	0.92	0.02	3.75		0.2 um	Janssen et al., 2021
Tasman Sea	IN2018V04	TS8	-34.67	154.55	1500	0.88	0.02	4.12		0.2 um	Janssen et al., 2021
Tasman Sea	IN2018V04	TS8	-34.67	154.55	2000	0.82	0.03	4.12		0.2 um	Janssen et al., 2021
Tasman Sea	IN2018V04	TS8	-34.67	154.55	3000	0.85	0.02	3.84		0.2 um	Janssen et al., 2021
Tasman Sea	IN2018V04	TS8	-34.67	154.55	3750	0.85	0.02	3.88		0.2 um	Janssen et al., 2021
S Pacific	GP13	3	-30	155	15	1.15828	0.0246542	3.18708		0.2 um	Gilliard, 2020 (MSc thesis)
S Pacific	GP13	3	-30	155	50	1.09701	0.0188135	3.02351		0.2 um	Gilliard, 2020 (MSc thesis)
S Pacific	GP13	3	-30	155	75	1.13982	0.02135	3.08679		0.2 um	Gilliard, 2020 (MSc thesis)
S Pacific	GP13	3	-30	155	100	1.10507	0.0257169	3.08726		0.2 um	Gilliard, 2020 (MSc thesis)
S Pacific	GP13	3	-30	155	125	1.12915	0.0207757	3.08461		0.2 um	Gilliard, 2020 (MSc thesis)
S Pacific	GP13	3	-30	155	300	1.13048	0.0228045	3.1878		0.2 um	Gilliard, 2020 (MSc thesis)
S Pacific	GP13	3	-30	155	750	1.05533	0.0261863	3.48086		0.2 um	Gilliard, 2020 (MSc thesis)
S Pacific	GP13	8	-30	160	15	1.10681	0.0324668	3.15105		0.2 um	Gilliard, 2020 (MSc thesis)
S Pacific	GP13	8	-30	160	30	1.16977	0.0254512	2.94174		0.2 um	Gilliard, 2020 (MSc thesis)
S Pacific	GP13	8	-30	160	50	1.17342	0.0300303	3.03996		0.2 um	Gilliard, 2020 (MSc thesis)
S Pacific	GP13	8	-30	160	100	1.12553	0.0276883	3.12414		0.2 um	Gilliard, 2020 (MSc thesis)
S Pacific	GP13	8	-30	160	200	1.15123	0.0289981	3.15903		0.2 um	Gilliard, 2020 (MSc thesis)
S Pacific	GP13	8	-30	160	300	1.11566	0.0237266	3.17963		0.2 um	Gilliard, 2020 (MSc thesis)
S Pacific	GP13	8	-30	160	750	0.985468	0.0235336	3.45238		0.2 um	Gilliard, 2020 (MSc thesis)
S Pacific	GP13	13	-30	165	15	1.15787	0.0249203	2.9639		0.2 um	Gilliard, 2020 (MSc thesis)
S Pacific	GP13	13	-30	165	50	1.13326	0.0221274	3.14479		0.2 um	Gilliard, 2020 (MSc thesis)
S Pacific	GP13	13	-30	165	100	1.12144	0.0344524	3.23232		0.2 um	Gilliard, 2020 (MSc thesis)
S Pacific	GP13	13	-30	165	200	1.15906	0.0219861	3.20434		0.2 um	Gilliard, 2020 (MSc thesis)
S Pacific	GP13	13	-30	165	300	1.12066	0.0243297	3.25089		0.2 um	Gilliard, 2020 (MSc thesis)
S Pacific	GP13	13	-30	165	750	1.03122	0.0147889	3.5351		0.2 um	Gilliard, 2020 (MSc thesis)
S Pacific	GP13	18	-30	170	15	1.21417	0.0451436	3.05863		0.2 um	Gilliard, 2020 (MSc thesis)
S Pacific	GP13	18	-30	170	50	1.12979	0.0246683	2.98979		0.2 um	Gilliard, 2020 (MSc thesis)
S Pacific	GP13	18	-30	170	100	1.12226	0.0330949	3.04595		0.2 um	Gilliard, 2020 (MSc thesis)
S Pacific	GP13	18	-30	170	300	1.11097	0.0231817	3.07069		0.2 um	Gilliard, 2020 (MSc thesis)
S Pacific	GP13	18	-30	170	750	1.00624	0.0256638	3.38282		0.2 um	Gilliard, 2020 (MSc thesis)
S Pacific	GP13	23	-30	175	15	1.11857	0.027981	3.21727		0.2 um	Gilliard, 2020 (MSc thesis)
S Pacific	GP13	23	-30	175	50	1.13292	0.0170118	3.18355		0.2 um	Gilliard, 2020 (MSc thesis)
S Pacific	GP13	23	-30	175	100	1.10601	0.0266659	3.05114		0.2 um	Gilliard, 2020 (MSc thesis)
S Pacific	GP13	23	-30	175	300	1.08057	0.0345422	3.08759		0.2 um	Gilliard, 2020 (MSc thesis)
S Pacific	GP13	23	-30	175	750	1.04571	0.0312162	3.42246		0.2 um	Gilliard, 2020 (MSc thesis)
S Pacific	GP13	28	-32.5	180	15	1.08806	0.0206733	3.14888		0.2 um	Gilliard, 2020 (MSc thesis)
S Pacific	GP13	28	-32.5	180	50	1.13107	0.028057	3.03578		0.2 um	Gilliard, 2020 (MSc thesis)
S Pacific	GP13	28	-32.5	180	100	1.10463	0.0275967	2.99845		0.2 um	Gilliard, 2020 (MSc thesis)
S Pacific	GP13	28	-32.5	180	150	1.10467	0.0183458	3.04227		0.2 um	Gilliard, 2020 (MSc thesis)
S Pacific	GP13	28	-32.5	180	300	1.08477	0.0284416	3.12044		0.2 um	Gilliard, 2020 (MSc thesis)
S Pacific	GP13	28	-32.5	180	750	1.03467	0.0261897	3.41363		0.2 um	Gilliard, 2020 (MSc thesis)
S Pacific	GP13	33	-32.5	-175	200	1.08067	0.0261688	3.11999		0.2 um	Gilliard, 2020 (MSc thesis)
S Pacific	GP13	33	-32.5	-175	300	1.01919	0.0268595	3.27239		0.2 um	Gilliard, 2020 (MSc thesis)
S Pacific	GP13	33	-32.5	-175	750	1.01667	0.023986	3.30302		0.2 um	Gilliard, 2020 (MSc thesis)
N Atlantic	Topogulf	TPG 14	24	-42	10			3.03		No	Jeandel & Minster 1987
N Atlantic	Topogulf	TPG 14	24	-42	35			2.86		No	Jeandel & Minster 1987
N Atlantic	Topogulf	TPG 14	24	-42	97			3.06		No	Jeandel & Minster 1987
N Atlantic	Topogulf	TPG 14	24	-42	199			2.88		No	Jeandel & Minster 1987
N Atlantic	Topogulf	TPG 14	24	-42	351			2.45		No	Jeandel & Minster 1987
N Atlantic	Topogulf	TPG 14	24	-42	502			2.47		No	Jeandel & Minster 1987
N Atlantic	Topogulf	TPG 14	24	-42	653			2.95		No	Jeandel & Minster 1987
N Atlantic	Topogulf	TPG 14	24	-42	806			2.82		No	Jeandel & Minster 1987
N Atlantic	Topogulf	TPG 14	24	-42	1005			3.02		No	Jeandel & Minster 1987
N Atlantic	Topogulf	TPG 14	24	-42	2016			2.87		No	Jeandel & Minster 1987
N Atlantic	Topogulf	TPG 14	24	-42	2998			3.11		No	Jeandel & Minster 1987
N Atlantic	Topogulf	TPG 14	24	-42	3495			3.46		No	Jeandel & Minster 1987
N Atlantic	Topogulf	TPG 26	25.9833	-47.1333	10			2.87		No	Jeandel & Minster 1987
N Atlantic	Topogulf	TPG 26	25.9833	-47.1333	100			2.7		No	Jeandel & Minster 1987
N Atlantic	Topogulf	TPG 26	25.9833	-47.1333	151			2.76		No	Jeandel & Minster 1987
N Atlantic	Topogulf	TPG 26	25.9833	-47.1333	199			2.54		No	Jeandel & Minster 1987
N Atlantic	Topogulf	TPG 26	25.9833	-47.1333	300			2.51		No	Jeandel & Minster 1987
N Atlantic	Topogulf	TPG 26	25.9833	-47.1333	402			2.53		No	Jeandel & Minster 1987
N Atlantic	Topogulf	TPG 26	25.9833	-47.1333	501			2.59		No	Jeandel & Minster 1987
N Atlantic	Topogulf	TPG 26	25.9833	-47.1333	616			2.9		No	Jeandel & Minster 1987
N Atlantic	Topogulf	TPG 26	25.9833	-47.1333	908			2.9		No	Jeandel & Minster 1987
N Atlantic	Topogulf	TPG 26	25.9833	-47.1333	998			2.87		No	Jeandel & Minster 1987
N Atlantic	Topogulf	TPG 26	25.9833	-47.1333	1298			2.89		No	Jeandel & Minster 1987
N Atlantic	Topogulf	TPG 26	25.9833	-47.1333	1501			2.65		No	Jeandel & Minster 1987
N Atlantic	Topogulf	TPG 26	25.9833	-47.1333	1598			3.03		No	Jeandel & Minster 1987
N Atlantic	Topogulf	TPG 26	25.9833	-47.1333	1700			3.05		No	Jeandel & Minster 1987
N Atlantic	Topogulf	TPG 26	25.9833	-47.1333	1900			3.05		No	Jeandel & Minster 1987
N Atlantic	Topogulf	TPG 26	25.9833	-47.1333	2006			2.99		No	Jeandel & Minster 1987
N Atlantic	Topogulf	TPG 26	25.9833	-47.1333	2101			3.08		No	Jeandel & Minster 1987
N Atlantic	Topogulf	TPG 26	25.9833	-47.1333	2747			3.29		No	Jeandel & Minster 1987
N Atlantic	Topogulf	TPG 26	25.9833	-47.1333	3002			3.28		No	Jeandel & Minster 1987
N Atlantic	Topogulf	TPG 26	25.9833	-47.1333	3503			3.21		No	Jeandel & Minster 1987
N Atlantic	Topogulf	TPG 45	33.3667	-27.5	10			3		No	Jeandel & Minster 1987
N Atlantic	Topogulf	TPG 45	33.3667	-27.5	40			2.73		No	Jeandel & Minster 1987
N Atlantic	Topogulf	TPG 45	33.3667	-27.5	70			2.6	0.15	No	Jeandel & Minster 1987
N Atlantic	Topogulf	TPG 45	33.3667	-27.5	197			2.41	0.2	No	Jeandel & Minster 1987
N Atlantic	Topogulf	TPG 45	33.3667	-27.5	399			3.03		No	Jeandel & Minster 1987
N Atlantic	Topogulf	TPG 45	33.3667	-27.5	596			2.55	0.1	No	Jeandel & Minster 1987
N Atlantic	Topogulf	TPG 45	33.3667	-27.5	799			3.1		No	Jeandel & Minster 1987
N Atlantic	Topogulf	TPG 45	33.3667	-27.5	850			3		No	Jeandel & Minster 1987
N Atlantic	Topogulf	TPG 45	33.3667	-27.5	900			2.7		No	Jeandel & Minster 1987
N Atlantic	Topogulf	TPG 45	33.3667	-27.5	999			3		No	Jeandel & Minster 1987
N Atlantic	Topogulf	TPG 45	33.3667	-27.5	1098			2.47	0.1	No	Jeandel & Minster 1987
N Atlantic	Topogulf	TPG 45	33.3667	-27.5	1198			3.05		No	Jeandel & Minster 1987
N Atlantic	Topogulf	TPG 45	33.3667	-27.5	1299			2.82	0.2	No	Jeandel & Minster 1987
N Atlantic	Topogulf	TPG 45	33.3667	-27.5	1498			2.99		No	Jeandel & Minster 1987
N Atlantic	Topogulf	TPG 45	33.3667	-27.5	1501			2.8		No	Jeandel & Minster 1987
N Atlantic	Topogulf	TPG 45	33.3667	-27.5	1700			2.99	0.3	No	Jeandel & Minster 1987
N Atlantic	Topogulf	TPG 45	33.3667	-27.5	1898			2.91		No	Jeandel & Minster 1987
N Atlantic	Topogulf	TPG 45	33.3667	-27.5	2003			3.09		No	Jeandel & Minster 1987
N Atlantic	Topogulf	TPG 45	33.3667	-27.5	2098			2.97		No	Jeandel & Minster 1987
N Atlantic	Topogulf	TPG 45	33.3667	-27.5	2496			2.97		No	Jeandel & Minster 1987
N Atlantic	Topogulf	TPG 45	33.3667	-27.5	2750			3.27		No	Jeandel & Minster 1987
N Atlantic	Topogulf	TPG 45	33.3667	-27.5	3253			3.62	0.4	No	Jeandel & Minster 1987
N Atlantic	Topogulf	TPG 45	33.3667	-27.5	3749			3.47		No	Jeandel & Minster 1987
N Atlantic	Topogulf	TPG 45	33.3667	-27.5	3963			3.81		No	Jeandel & Minster 1987
N Atlantic	Topogulf	TPG 67	34.1167	-41.7333	50			3.12	0.021	No	Jeandel & Minster 1987
N Atlantic	Topogulf	TPG 67	34.1167	-41.7333	125			2.6		No	Jeandel & Minster 1987
N Atlantic	Topogulf	TPG 67	34.1167	-41.7333	196			3.22	0.04	No	Jeandel & Minster 1987
N Atlantic	Topogulf	TPG 67	34.1167	-41.7333	200			3.29		No	Jeandel & Minster 1987
N Atlantic	Topogulf	TPG 67	34.1167	-41.7333	201			2.91		No	Jeandel & Minster 1987
N Atlantic	Topogulf	TPG 67	34.1167	-41.7333	350			2.83		No	Jeandel & Minster 1987
N Atlantic	Topogulf	TPG 67	34.1167	-41.7333	500			2.87		No	Jeandel & Minster 1987
N Atlantic	Topogulf	TPG 67	34.1167	-41.7333	649			3.16		No	Jeandel & Minster 1987
N Atlantic	Topogulf	TPG 67	34.1167	-41.7333	801			3.11		No	Jeandel & Minster 1987
N Atlantic	Topogulf	TPG 67	34.1167	-41.7333	1994			3.5		No	Jeandel & Minster 1987
N Atlantic	Topogulf	TPG 67	34.1167	-41.7333	2499			3.6		No	Jeandel & Minster 1987
N Atlantic	Topogulf	TPG 71	35.7	-40.7667	10			2.85		No	Jeandel & Minster 1987
N Atlantic	Topogulf	TPG 71	35.7	-40.7667	40			2.79		No	Jeandel & Minster 1987
N Atlantic	Topogulf	TPG 71	35.7	-40.7667	70			2.77		No	Jeandel & Minster 1987
N Atlantic	Topogulf	TPG 71	35.7	-40.7667	101			2.87		No	Jeandel & Minster 1987
N Atlantic	Topogulf	TPG 71	35.7	-40.7667	201			2.78		No	Jeandel & Minster 1987
N Atlantic	Topogulf	TPG 71	35.7	-40.7667	400			3.09		No	Jeandel & Minster 1987
N Atlantic	Topogulf	TPG 71	35.7	-40.7667	599			3		No	Jeandel & Minster 1987
N Atlantic	Topogulf	TPG 71	35.7	-40.7667	800			3.08		No	Jeandel & Minster 1987
N Atlantic	Topogulf	TPG 71	35.7	-40.7667	851			2.86		No	Jeandel & Minster 1987
N Atlantic	Topogulf	TPG 71	35.7	-40.7667	900			3.04		No	Jeandel & Minster 1987
N Atlantic	Topogulf	TPG 71	35.7	-40.7667	998			3.03		No	Jeandel & Minster 1987
N Atlantic	Topogulf	TPG 71	35.7	-40.7667	1710			2.98		No	Jeandel & Minster 1987
N Atlantic	Topogulf	TPG 71	35.7	-40.7667	2750			3.07		No	Jeandel & Minster 1987
N Atlantic	Topogulf	TPG 71	35.7	-40.7667	3749			3.34		No	Jeandel & Minster 1987
N Atlantic	Topogulf	TPG 89	37.95	-31.2667	102			3.25		No	Jeandel & Minster 1987
N Atlantic	Topogulf	TPG 89	37.95	-31.2667	200			3.1		No	Jeandel & Minster 1987
N Atlantic	Topogulf	TPG 89	37.95	-31.2667	650			3.2		No	Jeandel & Minster 1987
N Atlantic	Topogulf	TPG 89	37.95	-31.2667	801			2.78		No	Jeandel & Minster 1987
N Atlantic	Topogulf	TPG 89	37.95	-31.2667	1000			2.9		No	Jeandel & Minster 1987
N Atlantic	Topogulf	TPG 89	37.95	-31.2667	1250			3.3		No	Jeandel & Minster 1987
N Atlantic	Topogulf	TPG 89	37.95	-31.2667	1500			3		No	Jeandel & Minster 1987
N Atlantic	Topogulf	TPG 89	37.95	-31.2667	2000			2.68		No	Jeandel & Minster 1987
N Atlantic	Topogulf	TPG 89	37.95	-31.2667	2601			3.15		Yes	Jeandel & Minster 1987
N Atlantic	Topogulf	TPG 109	39.4333	-23.2333	10			2.93		No	Jeandel & Minster 1987
N Atlantic	Topogulf	TPG 109	39.4333	-23.2333	65			3.1		No	Jeandel & Minster 1987
N Atlantic	Topogulf	TPG 109	39.4333	-23.2333	198			2.89		No	Jeandel & Minster 1987
N Atlantic	Topogulf	TPG 109	39.4333	-23.2333	350			2.54		No	Jeandel & Minster 1987
N Atlantic	Topogulf	TPG 109	39.4333	-23.2333	500			2.75		No	Jeandel & Minster 1987
N Atlantic	Topogulf	TPG 109	39.4333	-23.2333	650			2.76		No	Jeandel & Minster 1987
N Atlantic	Topogulf	TPG 109	39.4333	-23.2333	996			2.76		No	Jeandel & Minster 1987
N Atlantic	Topogulf	TPG 109	39.4333	-23.2333	1997			2.82		No	Jeandel & Minster 1987
N Atlantic	Topogulf	TPG 109	39.4333	-23.2333	2999			2.9		No	Jeandel & Minster 1987
N Atlantic	Topogulf	TPG 109	39.4333	-23.2333	3407			3.28		No	Jeandel & Minster 1987
N Atlantic	Raft 21-06-83	Sargasso S	32.2	-64.5	0.1			2.9		?	Sherrell & Boyle, 1988
N Atlantic	NA	NA	54.5	-48.46	15			2.69906		?	Ramjuttun, 1997 (PhD thesis)
N Atlantic	NA	NA	54.5	-48.46	30			2.75529		?	Ramjuttun, 1997 (PhD thesis)
N Atlantic	NA	NA	54.5	-48.46	45			2.58659		?	Ramjuttun, 1997 (PhD thesis)
N Atlantic	NA	NA	54.5	-48.46	350			2.56785		?	Ramjuttun, 1997 (PhD thesis)
N Atlantic	NA	NA	54.5	-48.46	500			2.64283		?	Ramjuttun, 1997 (PhD thesis)
N Atlantic	NA	NA	54.5	-48.46	950			2.66157		?	Ramjuttun, 1997 (PhD thesis)
N Atlantic	NA	NA	54.5	-48.46	1407			3.09267		?	Ramjuttun, 1997 (PhD thesis)
N Atlantic	NA	NA	54.5	-48.46	1698			3.16764		?	Ramjuttun, 1997 (PhD thesis)
N Atlantic	NA	NA	54.5	-48.46	1990			3.03644		?	Ramjuttun, 1997 (PhD thesis)
N Atlantic	NA	NA	54.5	-48.46	2281			3.18638		?	Ramjuttun, 1997 (PhD thesis)
N Atlantic	NA	NA	54.5	-48.46	2573			3.35508		?	Ramjuttun, 1997 (PhD thesis)
N Atlantic	NA	NA	54.5	-48.46	2961			3.56125		?	Ramjuttun, 1997 (PhD thesis)
N Atlantic	November	Hydrostation S	32.1667	-64.5	0.1			2.92683	0.675422	No	Connelly et al., 2006
N Atlantic	November	Hydrostation S	32.1667	-64.5	10			2.95184		No	Connelly et al., 2006
N Atlantic	November	Hydrostation S	32.1667	-64.5	25				0.625391	No	Connelly et al., 2006
N Atlantic	November	Hydrostation S	32.1667	-64.5	50			2.82677	0.675422	No	Connelly et al., 2006
N Atlantic	November	Hydrostation S	32.1667	-64.5	100			3.17699	0.150094	No	Connelly et al., 2006
N Atlantic	November	Hydrostation S	32.1667	-64.5	150				0.250156	No	Connelly et al., 2006
N Atlantic	November	Hydrostation S	32.1667	-64.5	200			2.8768	0.425266	No	Connelly et al., 2006
N Atlantic	November	Hydrostation S	32.1667	-64.5	250			2.80175	0.150094	No	Connelly et al., 2006
N Atlantic	November	Hydrostation S	32.1667	-64.5	300			3.10194	0.0750469	No	Connelly et al., 2006
N Atlantic	November	Hydrostation S	32.1667	-64.5	350			2.8768		No	Connelly et al., 2006
N Atlantic	D361	2	12.5942	-17.9199	200	1.24	0.11	2.43982		0.2-0.45 um	Goring-Harford et al., 2018
N Atlantic	D361	2	12.5942	-17.9199	300	1.24	0.11	2.47981		0.2-0.45 um	Goring-Harford et al., 2018
N Atlantic	D361	2	12.5942	-17.9199	400	1.71	0.11	2.53981		0.2-0.45 um	Goring-Harford et al., 2018
N Atlantic	D361	2	12.5942	-17.9199	500	1.49	0.11	2.53981		0.2-0.45 um	Goring-Harford et al., 2018
N Atlantic	D361	2	12.5942	-17.9199	600	1.13	0.11	2.47981		0.2-0.45 um	Goring-Harford et al., 2018
N Atlantic	D361	2	12.5942	-17.9199	750	1.18	0.11	2.6698		0.2-0.45 um	Goring-Harford et al., 2018
N Atlantic	D361	2	12.5942	-17.9199	900	1.12	0.11	2.47981		0.2-0.45 um	Goring-Harford et al., 2018
N Atlantic	D361	2	12.5942	-17.9199	1700	1.25	0.11	2.53981		0.2-0.45 um	Goring-Harford et al., 2018
N Atlantic	D361	2	12.5942	-17.9199	2625	1.45	0.11	2.7098		0.2-0.45 um	Goring-Harford et al., 2018
N Atlantic	D361	3	12.61	-17.7157	200	1.28	0.11	2.49981		0.2-0.45 um	Goring-Harford et al., 2018
N Atlantic	D361	3	12.61	-17.7157	300	1.3	0.11	2.53981		0.2-0.45 um	Goring-Harford et al., 2018
N Atlantic	D361	3	12.61	-17.7157	400	1.23	0.11	2.53981		0.2-0.45 um	Goring-Harford et al., 2018
N Atlantic	D361	3	12.61	-17.7157	500	1.15	0.11	2.6198		0.2-0.45 um	Goring-Harford et al., 2018
N Atlantic	D361	3	12.61	-17.7157	600	1.24	0.11	2.55981		0.2-0.45 um	Goring-Harford et al., 2018
N Atlantic	D361	3	12.61	-17.7157	700	1.16	0.11	2.53981		0.2-0.45 um	Goring-Harford et al., 2018
N Atlantic	D361	3	12.61	-17.7157	900	1.12	0.11	2.7098		0.2-0.45 um	Goring-Harford et al., 2018
N Atlantic	D361	4	12.612	-17.5728	38	1.28	0.11	2.12984		0.2-0.45 um	Goring-Harford et al., 2018
N Atlantic	D361	4	12.612	-17.5728	40	1.21	0.11	2.18984		0.2-0.45 um	Goring-Harford et al., 2018
N Atlantic	D361	4	12.612	-17.5728	49	1.52	0.12	2.24983		0.2-0.45 um	Goring-Harford et al., 2018
N Atlantic	D361	5	12.5882	-17.5724	26	1.32	0.11	2.11984		0.2-0.45 um	Goring-Harford et al., 2018
N Atlantic	D361	5	12.5882	-17.5724	36	1.38	0.11	2.16984		0.2-0.45 um	Goring-Harford et al., 2018
N Atlantic	D361	5	12.5882	-17.5724	51	1.4	0.11	2.20983		0.2-0.45 um	Goring-Harford et al., 2018
N Atlantic	D361	5	12.5882	-17.5724	66	1.62	0.11	2.20983		0.2-0.45 um	Goring-Harford et al., 2018
N Atlantic	D361	5	12.5882	-17.5724	80	1.58	0.11	2.20983		0.2-0.45 um	Goring-Harford et al., 2018
N Atlantic	D361	5	12.5882	-17.5724	107	1.34	0.11	2.36982		0.2-0.45 um	Goring-Harford et al., 2018
N Atlantic	D361	11.5	-2.9625	-25.6148	25	1.1	0.11	2.39982		0.2-0.45 um	Goring-Harford et al., 2018
N Atlantic	D361	11.5	-2.9625	-25.6148	75	1.23	0.11	2.47981		0.2-0.45 um	Goring-Harford et al., 2018
N Atlantic	D361	11.5	-2.9625	-25.6148	100	1.22	0.11	2.49981		0.2-0.45 um	Goring-Harford et al., 2018
N Atlantic	D361	11.5	-2.9625	-25.6148	200	1.2	0.11	2.53981		0.2-0.45 um	Goring-Harford et al., 2018
N Atlantic	D361	11.5	-2.9625	-25.6148	400	1.08	0.11	2.78979		0.2-0.45 um	Goring-Harford et al., 2018
N Atlantic	D361	11.5	-2.9625	-25.6148	855	1.21	0.11	2.89978		0.2-0.45 um	Goring-Harford et al., 2018
N Atlantic	D361	11.5	-2.9625	-25.6148	1110	1.72	0.11	2.7098		0.2-0.45 um	Goring-Harford et al., 2018
N Atlantic	D361	11.5	-2.9625	-25.6148	1515	1.2	0.11	2.49981		0.2-0.45 um	Goring-Harford et al., 2018
N Atlantic	D361	11.5	-2.9625	-25.6148	2020	1.15	0.11	2.53981		0.2-0.45 um	Goring-Harford et al., 2018
N Atlantic	D361	18	12.0325	-28.9805	30	1.18	0.11	2.47981		0.2-0.45 um	Goring-Harford et al., 2018
N Atlantic	D361	18	12.0325	-28.9805	90	1.19	0.11	2.53981		0.2-0.45 um	Goring-Harford et al., 2018
N Atlantic	D361	18	12.0325	-28.9805	225	1.14	0.11	2.57981		0.2-0.45 um	Goring-Harford et al., 2018
N Atlantic	D361	18	12.0325	-28.9805	400	1.15	0.11	2.5998		0.2-0.45 um	Goring-Harford et al., 2018
N Atlantic	D361	18	12.0325	-28.9805	600	1.26	0.11	2.6198		0.2-0.45 um	Goring-Harford et al., 2018
N Atlantic	D361	18	12.0325	-28.9805	960	1.09	0.11	2.6898		0.2-0.45 um	Goring-Harford et al., 2018
N Atlantic	D361	18	12.0325	-28.9805	2020	1.13	0.11	2.53981		0.2-0.45 um	Goring-Harford et al., 2018
N Atlantic	D361	18	12.0325	-28.9805	3550	1.2	0.11	2.55981		0.2-0.45 um	Goring-Harford et al., 2018
N Atlantic	D361	18	12.0325	-28.9805	5740	1.08	0.11	2.84979		0.2-0.45 um	Goring-Harford et al., 2018
S Atlantic	DY110	62	-41.9	-35.43	400	0.96	0.03	2.92		0.2 um	Janssen et al., 2021
S Atlantic	DY110	62	-41.9	-35.43	600	0.89	0.03	2.92		0.2 um	Janssen et al., 2021
S Atlantic	DY110	60	-40.36	-31.04	400	0.92	0.03	3.09		0.2 um	Janssen et al., 2021
S Atlantic	DY110	60	-40.36	-31.04	600	1.01	0.02	3.22		0.2 um	Janssen et al., 2021
Trop. Atl	DY110	45	-10.67	-25.01	700	0.97	0.03	3.17		0.2 um	Janssen et al., 2021
Trop. Atl	DY110	40	-8.41	-24.98	800	0.95	0.03	3.25		0.2 um	Janssen et al., 2021
Trop. Atl	DY110	33	1.68	-25.01	800	1.07	0.04	2.9		0.2 um	Janssen et al., 2021
Indian	ACE Leg 1	3	-50.99	-72.04	125	0.97	0.03	3.71		0.2 um	Janssen et al., 2021
Indian	ACE Leg 1	5	-54.83	-95.68	100	0.99	0.03	3.58		0.2 um	Janssen et al., 2021
Indian	ACE Leg 1	5	-54.83	-95.68	150	0.96	0.03	3.59		0.2 um	Janssen et al., 2021
Indian	ACE Leg 1	5	-54.83	-95.68	300	0.99	0.03	3.64		0.2 um	Janssen et al., 2021
Indian	ACE Leg 1	5	-54.83	-95.68	500	1	0.03	3.73		0.2 um	Janssen et al., 2021
Indian	ACE Leg 1	5	-54.83	-95.68	1000	0.97	0.02	3.79		0.2 um	Janssen et al., 2021
Indian	ACE Leg 1	6	-53.2	-118.13	90	1.01	0.03	3.56		0.2 um	Janssen et al., 2021
Indian	ACE Leg 1	6	-53.2	-118.13	125	0.97	0.03	3.6		0.2 um	Janssen et al., 2021
Indian	ACE Leg 1	6	-53.2	-118.13	150	0.98	0.02	3.61		0.2 um	Janssen et al., 2021
Indian	ACE Leg 1	6	-53.2	-118.13	200	0.98	0.03	3.61		0.2 um	Janssen et al., 2021
Indian	ACE Leg 1	6	-53.2	-118.13	300	0.97	0.02	3.64		0.2 um	Janssen et al., 2021
Indian	ACE Leg 1	6	-53.2	-118.13	1000	0.95	0.02	3.78		0.2 um	Janssen et al., 2021
Subantarctic	ACE Leg 1	7	-46.906	141.931	15	1.02	0.02	3.28		0.2 um	Rickli et al., 2019
Subantarctic	ACE Leg 1	7	-46.906	141.931	40	1.04	0.02	3.27		0.2 um	Rickli et al., 2019
Subantarctic	ACE Leg 1	7	-46.906	141.931	60	1.05	0.02	3.27		0.2 um	Rickli et al., 2019
Subantarctic	ACE Leg 1	7	-46.906	141.931	150	1.06	0.02	3.27		0.2 um	Rickli et al., 2019
Subantarctic	ACE Leg 1	7	-46.906	141.931	250	1.05	0.02	3.27		0.2 um	Rickli et al., 2019
Subantarctic	ACE Leg 1	7	-46.906	141.931	500	1.03	0.02	3.31		0.2 um	Rickli et al., 2019
Subantarctic	ACE Leg 1	7	-46.906	141.931	750	0.99	0.03	3.39		0.2 um	Rickli et al., 2019
Subantarctic	ACE Leg 1	7	-46.906	141.931	1000	0.98	0.02	3.52		0.2 um	Rickli et al., 2019
Subantarctic	ACE Leg 2	8	-46.393	150.389	15	1.04	0.02	3.22		0.2 um	Rickli et al., 2019
Subantarctic	ACE Leg 2	8	-46.393	150.389	40	1.05	0.03	3.23		0.2 um	Rickli et al., 2019
Subantarctic	ACE Leg 2	8	-46.393	150.389	60	1.05	0.03	3.22		0.2 um	Rickli et al., 2019
Subantarctic	ACE Leg 2	8	-46.393	150.389	150	1.06	0.02	3.22		0.2 um	Rickli et al., 2019
Subantarctic	ACE Leg 2	8	-46.393	150.389	250	1.05	0.02	3.22		0.2 um	Rickli et al., 2019
Subantarctic	ACE Leg 2	8	-46.393	150.389	500	1.02	0.02	3.3		0.2 um	Rickli et al., 2019
Subantarctic	ACE Leg 2	8	-46.393	150.389	750	1.02	0.02	3.3		0.2 um	Rickli et al., 2019
Southern Ocean	ACE Leg 2	9	-53.583	149.298	15	0.994695	0.0272357	3.4543		0.2 um	Rickli et al., 2019
Southern Ocean	ACE Leg 2	9	-53.583	149.298	30	0.982515	0.0200456	3.43992		0.2 um	Rickli et al., 2019
Southern Ocean	ACE Leg 2	9	-53.583	149.298	50	0.947687	0.0259342	3.44101		0.2 um	Rickli et al., 2019
Southern Ocean	ACE Leg 2	9	-53.583	149.298	80	0.987257	0.02816	3.39887		0.2 um	Rickli et al., 2019
Southern Ocean	ACE Leg 2	9	-53.583	149.298	125	1.00299	0.0237741	3.37345		0.2 um	Rickli et al., 2019
Southern Ocean	ACE Leg 2	9	-53.583	149.298	200	0.974219	0.0199329	3.41468		0.2 um	Rickli et al., 2019
Southern Ocean	ACE Leg 2	9	-53.583	149.298	300	0.986134	0.0217576	3.46134		0.2 um	Rickli et al., 2019
Southern Ocean	ACE Leg 2	9	-53.583	149.298	500	0.958579	0.0201331	3.51683		0.2 um	Rickli et al., 2019
Southern Ocean	ACE Leg 2	9	-53.583	149.298	750	0.926134	0.0178459	3.64055		0.2 um	Rickli et al., 2019
Southern Ocean	ACE Leg 2	9	-53.583	149.298	1000	0.903876	0.0215761	3.75809		0.2 um	Rickli et al., 2019
Southern Ocean	ACE Leg 2	10	-59.611	148.64	15	0.92833	0.0289797	3.7147		0.2 um	Rickli et al., 2019
Southern Ocean	ACE Leg 2	10	-59.611	148.64	30	0.896134	0.0174323	3.73157		0.2 um	Rickli et al., 2019
Southern Ocean	ACE Leg 2	10	-59.611	148.64	50	0.930946	0.026479	3.73432		0.2 um	Rickli et al., 2019
Southern Ocean	ACE Leg 2	10	-59.611	148.64	80	0.908166	0.0246732	3.74505		0.2 um	Rickli et al., 2019
Southern Ocean	ACE Leg 2	10	-59.611	148.64	100	0.933448	0.028017	3.74458		0.2 um	Rickli et al., 2019
Southern Ocean	ACE Leg 2	10	-59.611	148.64	125	0.922345	0.0230453	3.75284		0.2 um	Rickli et al., 2019
Southern Ocean	ACE Leg 2	10	-59.611	148.64	150	0.915813	0.0215944	3.76369		0.2 um	Rickli et al., 2019
Southern Ocean	ACE Leg 2	10	-59.611	148.64	200	0.903756	0.0245013	3.80138		0.2 um	Rickli et al., 2019
Southern Ocean	ACE Leg 2	10	-59.611	148.64	250	0.931819	0.0216298	3.81353		0.2 um	Rickli et al., 2019
Southern Ocean	ACE Leg 2	10	-59.611	148.64	500	0.904105	0.0231482	3.85867		0.2 um	Rickli et al., 2019
Southern Ocean	ACE Leg 2	10	-59.611	148.64	750	0.914486	0.0226538	3.82795		0.2 um	Rickli et al., 2019
Southern Ocean	ACE Leg 2	10	-59.611	148.64	1000	0.907519	0.0257461	3.87457		0.2 um	Rickli et al., 2019
Southern Ocean	ACE Leg 2	12	-67.189	145.721	15	0.893	0.0198388	3.68179		0.2 um	Rickli et al., 2019
Southern Ocean	ACE Leg 2	12	-67.189	145.721	25	0.913	0.026027	3.66261		0.2 um	Rickli et al., 2019
Southern Ocean	ACE Leg 2	12	-67.189	145.721	50	0.903	0.0291799	3.77548		0.2 um	Rickli et al., 2019
Southern Ocean	ACE Leg 2	12	-67.189	145.721	80	0.893	0.0191788	3.82127		0.2 um	Rickli et al., 2019
Southern Ocean	ACE Leg 2	12	-67.189	145.721	150	0.893	0.0241099	3.83378		0.2 um	Rickli et al., 2019
Southern Ocean	ACE Leg 2	12	-67.189	145.721	250	0.923	0.0184538	3.8303		0.2 um	Rickli et al., 2019
Southern Ocean	ACE Leg 2	12	-67.189	145.721	500	0.903	0.0188374	3.8619		0.2 um	Rickli et al., 2019
Southern Ocean	ACE Leg 2	14	-67.29	163.536	15	0.928375	0.0214081	3.78367		0.2 um	Rickli et al., 2019
Southern Ocean	ACE Leg 2	14	-67.29	163.536	40	0.917041	0.0221697	3.797		0.2 um	Rickli et al., 2019
Southern Ocean	ACE Leg 2	14	-67.29	163.536	100	0.918889	0.0270599	3.82488		0.2 um	Rickli et al., 2019
Southern Ocean	ACE Leg 2	14	-67.29	163.536	150	0.917739	0.026483	3.8217		0.2 um	Rickli et al., 2019
Southern Ocean	ACE Leg 2	14	-67.29	163.536	250	0.895526	0.0268355	3.87096		0.2 um	Rickli et al., 2019
Southern Ocean	ACE Leg 2	14	-67.29	163.536	500	0.897786	0.0299991	3.91672		0.2 um	Rickli et al., 2019
Southern Ocean	ACE Leg 2	15	-67.1	167.36	15	0.91034	0.0208972	3.79932		0.2 um	Rickli et al., 2019
Southern Ocean	ACE Leg 2	15	-67.1	167.36	50	0.92268	0.0249865	3.80432		0.2 um	Rickli et al., 2019
Southern Ocean	ACE Leg 2	15	-67.1	167.36	100	0.922612	0.0198175	3.85241		0.2 um	Rickli et al., 2019
Southern Ocean	ACE Leg 2	15	-67.1	167.36	150	0.895772	0.0252941	3.88096		0.2 um	Rickli et al., 2019
Southern Ocean	ACE Leg 2	15	-67.1	167.36	500	0.891983	0.0294302	3.95325		0.2 um	Rickli et al., 2019
Southern Ocean	ACE Leg 2	18	-63.963	-66.242	15	0.889454	0.0244483	3.73979		0.2 um	Rickli et al., 2019
Southern Ocean	ACE Leg 2	18	-63.963	-66.242	50	0.892449	0.0232822	3.77202		0.2 um	Rickli et al., 2019
Southern Ocean	ACE Leg 2	18	-63.963	-66.242	100	0.883391	0.0155041	3.80084		0.2 um	Rickli et al., 2019
Southern Ocean	ACE Leg 2	18	-63.963	-66.242	180	0.870324	0.0185041	3.86396		0.2 um	Rickli et al., 2019
Southern Ocean	ACE Leg 2	18	-63.963	-66.242	300	0.913592	0.0202444	3.87997		0.2 um	Rickli et al., 2019
Southern Ocean	ACE Leg 2	20	-59.6	-67.919	15	0.933641	0.0189384	3.64873		0.2 um	Rickli et al., 2019
Southern Ocean	ACE Leg 2	20	-59.6	-67.919	60	0.935099	0.0196956	3.67848		0.2 um	Rickli et al., 2019
Southern Ocean	ACE Leg 2	20	-59.6	-67.92	70	0.98	0.03	3.63		0.2 um	Janssen et al., 2021
Southern Ocean	ACE Leg 2	20	-59.6	-67.919	125	0.931942	0.0215881	3.6095		0.2 um	Rickli et al., 2019
Southern Ocean	ACE Leg 2	20	-59.6	-67.919	250	0.925317	0.0224741	3.66298		0.2 um	Rickli et al., 2019
Southern Ocean	ACE Leg 2	20	-59.6	-67.919	580	0.900631	0.0200633	3.80098		0.2 um	Rickli et al., 2019
Southern Ocean	ACE Leg 2	20	-59.6	-67.919	1000	0.888864	0.0243919	3.87192		0.2 um	Rickli et al., 2019
Subantarctic	IN2018V02	SOTS	-46.97	141.93	1000	1	0.04	3.19		0.2 um	Janssen et al., 2021
Subantarctic	IN2018V02	SOTS	-46.97	141.93	1250	0.97	0.03	3.21		0.2 um	Janssen et al., 2021
Subantarctic	IN2018V04	PS1	-47	141.9	1000	0.96	0.03	3.4		0.2 um	Janssen et al., 2021
Subantarctic	IN2018V04	PS1	-47	141.9	1500	0.87	0.02	3.8		0.2 um	Janssen et al., 2021
Subantarctic	IN2018V04	PS1	-47	141.9	2000	0.86	0.03	3.95		0.2 um	Janssen et al., 2021
Subantarctic	IN2018V04	PS1	-47	141.9	2500	0.84	0.02	3.94		0.2 um	Janssen et al., 2021
Subantarctic	IN2018V04	PS1	-47	141.9	3000	0.8	0.02	4.13		0.2 um	Janssen et al., 2021
Subantarctic	IN2018V04	PS1	-47	141.9	3500	0.83	0.01	4		0.2 um	Janssen et al., 2021
Subantarctic	IN2018V04	PS1	-47	141.9	4000	0.82	0.02	4.08		0.2 um	Janssen et al., 2021
Subantarctic	IN2018V04	PS2	-45.7	153.5	1000	0.91	0.03	3.42		0.2 um	Janssen et al., 2021
Subantarctic	IN2018V04	PS2	-45.7	153.5	1500	0.87	0.03	3.8		0.2 um	Janssen et al., 2021
Subantarctic	IN2018V04	PS2	-45.7	153.5	2000	0.89	0.02	3.68		0.2 um	Janssen et al., 2021
Subantarctic	IN2018V04	PS2	-45.7	153.5	2500	0.88	0.02	3.78		0.2 um	Janssen et al., 2021
Subantarctic	IN2018V04	PS2	-45.7	153.5	3000	0.87	0.02	3.91		0.2 um	Janssen et al., 2021
Subantarctic	IN2018V04	PS2	-45.7	153.5	3500	0.83	0.02	3.94		0.2 um	Janssen et al., 2021
Subantarctic	IN2018V04	PS2	-45.7	153.5	4000	0.87	0.02	4.05		0.2 um	Janssen et al., 2021
Subantarctic	IN2018V04	PS2	-45.7	153.5	4500	0.84	0.02	4.08		0.2 um	Janssen et al., 2021
McKenzie Shelf	CA Arctic GEOTRACES 2011	S1	69.5	-137.983	50	1.49	0.08	1.7309		0.45 um	Scheiderich et al., 2015
McKenzie Shelf	CA Arctic GEOTRACES 2011	S1.1	69.6667	-138.15	100	1.38	0.06	1.88476		0.45 um	Scheiderich et al., 2015
McKenzie Shelf	CA Arctic GEOTRACES 2011	S1.2	69.8167	-138.333	100	1.33	0.06	1.82706		0.45 um	Scheiderich et al., 2015
McKenzie Shelf	CA Arctic GEOTRACES 2011	S2	70	-138	100	1.39	0.06	1.90399		0.45 um	Scheiderich et al., 2015
Beaufort Sea	CA Arctic GEOTRACES 2011	L1	71.1	-139.017	10	1.53	0.06	1.40395		0.45 um	Scheiderich et al., 2015
Beaufort Sea	CA Arctic GEOTRACES 2011	L1	71.1	-139.017	10	1.47	0.06	1.23086		0.45 um	Scheiderich et al., 2015
Beaufort Sea	CA Arctic GEOTRACES 2011	L1	71.1	-139.017	300	1.19	0.06	2.55788		0.45 um	Scheiderich et al., 2015
Beaufort Sea	CA Arctic GEOTRACES 2011	L1	71.1	-139.017	1500	1.08	0.06	2.78867		0.45 um	Scheiderich et al., 2015
Beaufort Sea	CA Arctic GEOTRACES 2011	L1.1	72.5167	-136.683	10	1.47	0.06	1.42318		0.45 um	Scheiderich et al., 2015
Beaufort Sea	CA Arctic GEOTRACES 2011	L1.1	72.5167	-136.683	50	1.47	0.06	1.53858		0.45 um	Scheiderich et al., 2015
Beaufort Sea	CA Arctic GEOTRACES 2011	L1.1	72.5167	-136.683	50	1.49	0.06	1.51934		0.45 um	Scheiderich et al., 2015
Beaufort Sea	CA Arctic GEOTRACES 2011	L1.1	72.5167	-136.683	100	1.55	0.06	1.96169		0.45 um	Scheiderich et al., 2015
Beaufort Sea	CA Arctic GEOTRACES 2011	L1.1	72.5167	-136.683	200	1.35	0.06	2.17324		0.45 um	Scheiderich et al., 2015
Beaufort Sea	CA Arctic GEOTRACES 2011	L1.1	72.5167	-136.683	250	1.2	0.06	2.76944		0.45 um	Scheiderich et al., 2015
Beaufort Sea	CA Arctic GEOTRACES 2011	L1.1	72.5167	-136.683	400	1.17	0.06	2.88483		0.45 um	Scheiderich et al., 2015
Beaufort Sea	CA Arctic GEOTRACES 2011	L1.1	72.5167	-136.683	1000	1.05	0.06	2.94253		0.45 um	Scheiderich et al., 2015
Beaufort Sea	CA Arctic GEOTRACES 2011	L1.1	72.5167	-136.683	1000	1.09	0.06	2.71174		0.45 um	Scheiderich et al., 2015
Beaufort Sea	CA Arctic GEOTRACES 2011	L1.1	72.5167	-136.683	2000	1.06	0.06	2.96176		0.45 um	Scheiderich et al., 2015
Beaufort Sea	CA Arctic GEOTRACES 2011	L1.1	72.5167	-136.683	2400	1.05	0.06	3.13485		0.45 um	Scheiderich et al., 2015
Beaufort Sea	CA Arctic GEOTRACES 2011	L1.1	72.5167	-136.683	2400	0.99	0.06	2.98099		0.45 um	Scheiderich et al., 2015
Beaufort Sea	CA Arctic GEOTRACES 2011	L2	74.6333	-137.333	600	1.12	0.06	2.8079		0.45 um	Scheiderich et al., 2015
Beaufort Sea	CA Arctic GEOTRACES 2011	L2	74.6333	-137.333	2000	1.06	0.06	2.69251		0.45 um	Scheiderich et al., 2015
Beaufort Sea	CA Arctic GEOTRACES 2011	L2	74.6333	-137.333	2500	1.07	0.08	3.01946		0.45 um	Scheiderich et al., 2015
Arctic	HLY1502	43	85.13	-150.1	19.3	1.56	0.06	1.62		0.2 um	Moos, 2018 (PhD thesis)
Arctic	HLY1502	43	85.13	-150.1	34.9	1.65	0.06	1.65		0.2 um	Moos, 2018 (PhD thesis)
Arctic	HLY1502	43	85.13	-150.1	53.9	1.33	0.06	1.82		0.2 um	Moos, 2018 (PhD thesis)
Arctic	HLY1502	43	85.13	-150.1	73.9	1.31	0.06	1.9		0.2 um	Moos, 2018 (PhD thesis)
Arctic	HLY1502	43	85.13	-150.1	99.6	1.33	0.06	1.88		0.2 um	Moos, 2018 (PhD thesis)
Arctic	HLY1502	43	85.13	-150.1	138.9	1.05	0.06	2.36		0.2 um	Moos, 2018 (PhD thesis)
Arctic	HLY1502	43	85.13	-150.1	173.8	0.96	0.06	2.52		0.2 um	Moos, 2018 (PhD thesis)
Arctic	HLY1502	43	85.13	-150.1	224	0.87	0.06	2.58		0.2 um	Moos, 2018 (PhD thesis)
Arctic	HLY1502	43	85.13	-150.1	274.4	1	0.06	2.56		0.2 um	Moos, 2018 (PhD thesis)
Arctic	HLY1502	43	85.13	-150.1	414	0.99	0.06	2.64		0.2 um	Moos, 2018 (PhD thesis)
Arctic	HLY1502	43	85.13	-150.1	498.9	0.87	0.06	2.58		0.2 um	Moos, 2018 (PhD thesis)
Arctic	HLY1502	43	85.13	-150.1	499.2	0.81	0.06	2.55		0.2 um	Moos, 2018 (PhD thesis)
Arctic	HLY1502	43	85.13	-150.1	599.1	0.86	0.06	2.62		0.2 um	Moos, 2018 (PhD thesis)
Arctic	HLY1502	43	85.13	-150.1	698.9	1.04	0.06	2.48		0.2 um	Moos, 2018 (PhD thesis)
Arctic	HLY1502	43	85.13	-150.1	848.9	0.93	0.06	2.62		0.2 um	Moos, 2018 (PhD thesis)
Arctic	HLY1502	43	85.13	-150.1	998.8	0.93	0.06	2.52		0.2 um	Moos, 2018 (PhD thesis)
Arctic	HLY1502	43	85.13	-150.1	1198.8	0.94	0.06	2.74		0.2 um	Moos, 2018 (PhD thesis)
Arctic	HLY1502	43	85.13	-150.1	1398.9	0.84	0.06	2.63		0.2 um	Moos, 2018 (PhD thesis)
Arctic	HLY1502	43	85.13	-150.1	1598.9	0.78	0.06	3.46		0.2 um	Moos, 2018 (PhD thesis)
Arctic	HLY1502	43	85.13	-150.1	1798.8	0.8	0.06	2.66		0.2 um	Moos, 2018 (PhD thesis)
Arctic	HLY1502	43	85.13	-150.1	2053.6	0.77	0.06	2.6		0.2 um	Moos, 2018 (PhD thesis)
Arctic	HLY1502	43	85.13	-150.1	2153.7	0.8	0.06	2.69		0.2 um	Moos, 2018 (PhD thesis)
Arctic	HLY1502	43	85.13	-150.1	2179	1	0.06	2.73		0.2 um	Moos, 2018 (PhD thesis)
Arctic	HLY1502	61	72.8	-159.62	1	1.43	0.06	1.63		0.2 um	Moos, 2018 (PhD thesis)
Arctic	HLY1502	61	72.8	-159.62	20.4	1.36	0.06	1.95		0.2 um	Moos, 2018 (PhD thesis)
Arctic	HLY1502	61	72.8	-159.62	54.9	3.85	0.06	1.57		0.2 um	Moos, 2018 (PhD thesis)
Arctic	HLY1502	61	72.8	-159.62	79.6	4.15	0.06	1.52		0.2 um	Moos, 2018 (PhD thesis)

## Sheet: References
References:
Connelly, D. P., Statham, P. J., & Knap, A. H. (2006). Seasonal changes in speciation of dissolved chromium in the surface Sargasso Sea. Deep-Sea Research Part I: Oceanographic Research Papers, 53(12), 1975–1988. https://doi.org/10.1016/j.dsr.2006.09.005
Gilliard, D. (2020). Dissolved chromium concentration and d53Cr as a tool to quantify the strength of the biological pump in the South Pacific Ocean. Master Thesis. University of Bern
Goring-Harford, H. J., Klar, J. K., Pearce, C. R., Connelly, D. P., Achterberg, E. P., & James, R. H. (2018). Behaviour of chromium isotopes in the eastern sub-tropical Atlantic Oxygen Minimum Zone. Geochimica et Cosmochimica Acta, 236, 41–59. https://doi.org/10.1016/j.gca.2018.03.004
Huang, T., Moos, S. B., & Boyle, E. A. (2021). Trivalent chromium isotopes in the eastern tropical North Pacific oxygen deficient zone. Proceedings of the National Academy of Sciences of the United States of America, 118(8), e1918605118. https://doi.org/10.1073/pnas.1918605118
Isshiki, K., Sohrin, Y., Karatani, H., & Nakayam, E. (1989). Preconcentration of chromium(III) and chromium(VI) in sea water by complexation with quinolin-8-ol and adsorption on macroporous resin. Analytica Chimica Acta, 224, 55–64. https://doi.org/10.1016/S0003-2670(00)83444-3
Janssen, D. J., Rickli, J., Quay, P. D., White, A. E., Nasemann, P., & Jaccard, S. L. (2020). Biological Control of Chromium Redox and Stable Isotope Composition in the Surface Ocean. Global Biogeochemical Cycles, 34(1). https://doi.org/10.1029/2019GB006397
Janssen, D. J., Rickli, J., Abbott, A. N., Ellwood, M. J., Twining, B. S., Ohnemus, D. C., Nasemann, P., Gilliard, D. and Jaccard, S. L. (2021). Release from biogenic particles, benthic fluxes, and deep water circulation control Cr and δ53Cr distributions in the ocean interior, Earth Planet. Sci. Lett., under review, preprint doi:10.1002/essoar.10506828.1
Jeandel, C., & Minster, J. F. (1987). Chromium behavior in the ocean: Global versus regional processes. Global Biogeochemical Cycles, 1(2), 131–154. https://doi.org/10.1029/GB001i002p00131
Moos, S. B. (2018). The marine biogeochemistry of chromium isotopes. PhD Thesis. Massachusetts Institute of Technology. http://hdl.handle.net/1721.1/115788
Moos, S. B., & Boyle, E. A. (2019). Determination of accurate and precise chromium isotope ratios in seawater samples by MC-ICP-MS illustrated by analysis of SAFe Station in the North Pacific Ocean. Chemical Geology, 511(July), 481–493. https://doi.org/10.1016/j.chemgeo.2018.07.027
Moos, S. B., Boyle, E. A., Altabet, M. A., & Bourbonnais, A. (2020). Investigating the cycling of chromium in the oxygen deficient waters of the Eastern Tropical North Pacific Ocean and the Santa Barbara Basin using stable isotopes. Marine Chemistry, 221, 103756. https://doi.org/10.1016/j.marchem.2020.103756
Mugo, R. K. (1997). The Geochemistry of Chromium in Various Marine Environments. PhD Thesis. University of British Columbia
Murray, J. W., Spell, B., & Paul, B. (1983). The contrasting geochemistry of manganese and chromium in the eastern tropical Pacific Ocean. In Trace Metals in Sea Water (pp. 643–669).
Nasemann, P., Janssen, D. J., Rickli, J., Grasse, P., & Jaccard, S. L. (2020). Chromium reduction and associated stable isotope fractionation restricted to anoxic shelf waters in the Peruvian Oxygen Minimum Zone. Geochimica et Cosmochimica Acta, 285, 207–224. https://doi.org/10.1016/j.gca.2020.06.027
Ramjuttun, R. (1997). The chemical speciation of chromium in seawater by cathodic stripping voltammetry. PhD Thesis. Memorial University of Newfoundland
Rickli, J., Janssen, D. J., Hassler, C., Ellwood, M. J., & Jaccard, S. L. (2019). Chromium biogeochemistry and stable isotope distribution in the Southern Ocean. Geochimica et Cosmochimica Acta, 262, 188–206. https://doi.org/10.1016/j.gca.2019.07.033
Rue, E. L., Smith, G. J., Cutter, G. A., & Bruland, K. W. (1997). The response of trace element redox couples to suboxic conditions in the water column. Deep-Sea Research Part I: Oceanographic Research Papers, 44(1), 113–134. https://doi.org/10.1016/S0967-0637(96)00088-X
Scheiderich, K., Amini, M., Holmden, C., & Francois, R. (2015). Global variability of chromium isotopes in seawater demonstrated by Pacific, Atlantic, and Arctic Ocean samples. Earth and Planetary Science Letters, 423(2015), 87–97. https://doi.org/10.1016/j.epsl.2015.04.030
Sherrell, R. M., & Boyle, E. A. (1988). Zinc, chromium, vanadium and iron in the Mediterranean Sea. Deep Sea Research Part A, Oceanographic Research Papers, 35(8), 1319–1334. https://doi.org/10.1016/0198-0149(88)90085-4
